# Inferring kinetic parameters of oscillatory gene regulation from single cell time series data

Joshua Burton<sup>1</sup>, Cerys S. Manning<sup>2</sup>, Magnus Rattray<sup>1</sup>, Nancy Papalopulu<sup>2,†</sup>, and Jochen Kursawe<sup>3,\*</sup>

<sup>1</sup>Division of Informatics, Imaging and Data Sciences, Faculty of Biology Medicine and Health, The University of Manchester, Oxford Road, Manchester, M13 9PT, UK

<sup>2</sup>School of Medical Sciences, Division of Developmental Biology and Medicine, Faculty of Biology Medicine and Health, The University of Manchester, Oxford Road, Manchester M13 9PT, UK

<sup>3</sup>School of Mathematics and Statistics, University of St Andrews, North Haugh, St Andrews, KY16 9SS, UK

<sup>†</sup>[nancy.papalopulu@manchester.ac.uk](mailto:nancy.papalopulu@manchester.ac.uk)

<sup>\*</sup>[jochen.kursawe@st-andrews.ac.uk](mailto:jochen.kursawe@st-andrews.ac.uk)

## Abstract

Gene expression dynamics, such as stochastic oscillations and aperiodic fluctuations, have been associated with cell fate changes in multiple contexts, including development and cancer. Single cell live imaging of protein expression with endogenous reporters is widely used to observe such gene expression dynamics. However, the experimental investigation of regulatory mechanisms underlying the observed dynamics is challenging, since these mechanisms include complex interactions of multiple processes, including transcription, translation, and protein degradation. Here, we present a Bayesian method to infer kinetic parameters of oscillatory gene expression regulation using an auto-negative feedback motif with delay. Specifically, we use a delay-adapted nonlinear Kalman filter within a Metropolis-adjusted Langevin algorithm to identify posterior probability distributions. Our method can be applied to time series data on gene expression from single cells and is able to infer multiple parameters simultaneously. We apply it to published

data on murine neural progenitor cells and show that it outperforms alternative methods. We further analyse how parameter uncertainty depends on the duration and time resolution of an imaging experiment, to make experimental design recommendations. This work demonstrates the utility of parameter inference on time course data from single cells and enables new studies on cell fate changes and population heterogeneity.

**Keywords:** Parameter inference, Bayesian methods, Gene expression oscillations, MCMC, Kalman filters, Stem cell differentiation

[This document includes the Supplementary Information, starting on page 38]

# 1 Introduction

The identification of regulatory mechanisms that control gene expression may have important implications in biological systems. Cell state transitions are a key contributor to many processes in healthy and diseased tissue, and as such they play a major role in development, regeneration, and cancer. There is an increasing amount of literature uncovering the relationship between gene expression dynamics, i.e. dynamic changes in protein copy numbers from a single gene, and cell state transitions<sup>[1–7]</sup>. For example, [Imayoshi et al. \(2013\)](#)<sup>[1]</sup> used optogenetics to show that oscillatory expression of the transcription factor ASCL1 promotes cell proliferation of mouse neural progenitor cells, whereas sustained expression promotes differentiation. [Manning et al. \(2019\)](#)<sup>[2]</sup> linked aperiodic HES5 protein expression dynamics to murine neural progenitors, and declining oscillatory dynamics to differentiating neurons. Further evidence by [Soto et. al.](#) and [Phillips et. al.](#)<sup>[3;8]</sup> demonstrates the contribution of gene expression noise to dynamically driven cell state transitions.

Experimentally, the dynamics of gene expression can be studied using a variety of approaches. Accurate measurements of protein dynamics are made through live-imaging of transcription factors in single cells, which provides real-time information on gene regulation and identifies cell-to-cell heterogeneity. This can be achieved through fluorescent fusion reporters<sup>[9]</sup>, where endogenously expressed proteins are attached to fluorescent reporter molecules. Fluorescence microscopy can then be used to obtain time series data that quantifies protein expression levels over time (Figure 1A and B). It may further be possible to translate the fluorescence intensity into exact protein copy

numbers<sup>[2;3]</sup>. Fluorescent protein reporters are widely used to research the role of transcription factor dynamics in cell differentiation events, and have provided dynamic data on gene expression in various contexts, such as neural differentiation, circadian regulation, and cell cycle regulation<sup>[1;2;10–13]</sup>.

Mechanistically, dynamic gene expression is controlled by multiple processes, including transcriptional pulsing (transcription occurring in pulses or bursts), stochastic fluctuations (due to a limited number of molecules), and gene regulatory interactions. In order to understand how these processes interact to modulate gene expression dynamics it is necessary to use mathematical models.

Within systems biology, mathematical models are often represented as a collection of gene regulatory motifs<sup>[14;15]</sup>. One very common motif is the delay-mediated, auto-repressive negative feedback loop (Figure 1C), which gives rise to oscillations and other dynamic patterns of gene expression that have been observed in somitogenesis, neurogenesis, and in cancer cell lines<sup>[2;3;7;10;16]</sup>. In this motif, a protein represses the transcription of its own gene. In combination with delays that are intrinsic to biological systems, this admits a range of dynamic behaviours, most notably oscillations at the mRNA and protein level. Regulation of gene expression through the auto-negative feedback motif contributes to cell state changes in multiple systems, including neural differentiation<sup>[2;17;18]</sup>.

Despite great advances in the collection of dynamic data on gene expression, and the modelling of these data, challenges remain when calibrating models to data. Even simple mathematical models, such as the auto-negative feedback motif (Figure 1C), employ multiple model parameters that correspond to biophysical quantities. For example, the auto-negative feedback motif uses rates of transcription, translation, degradation, and other parameters to predict protein and mRNA expression dynamics. Each of these parameters can take a large range of values (Figure 1D). For many application areas, parameter inference, i.e. identifying which parameters correspond to a given experimentally obtained data set, remains an open problem, since it requires the ‘inverse’ of the model, which typically cannot be computed directly. However, solving this problem bears great potential for the research of gene expression dynamics and its links to cell fate. Identifying which parameter changes correspond to observed differences in gene expression dynamics may illuminate the molecular pathways that contribute to cell fate control, and identify new sources of heterogeneity within a cell population.

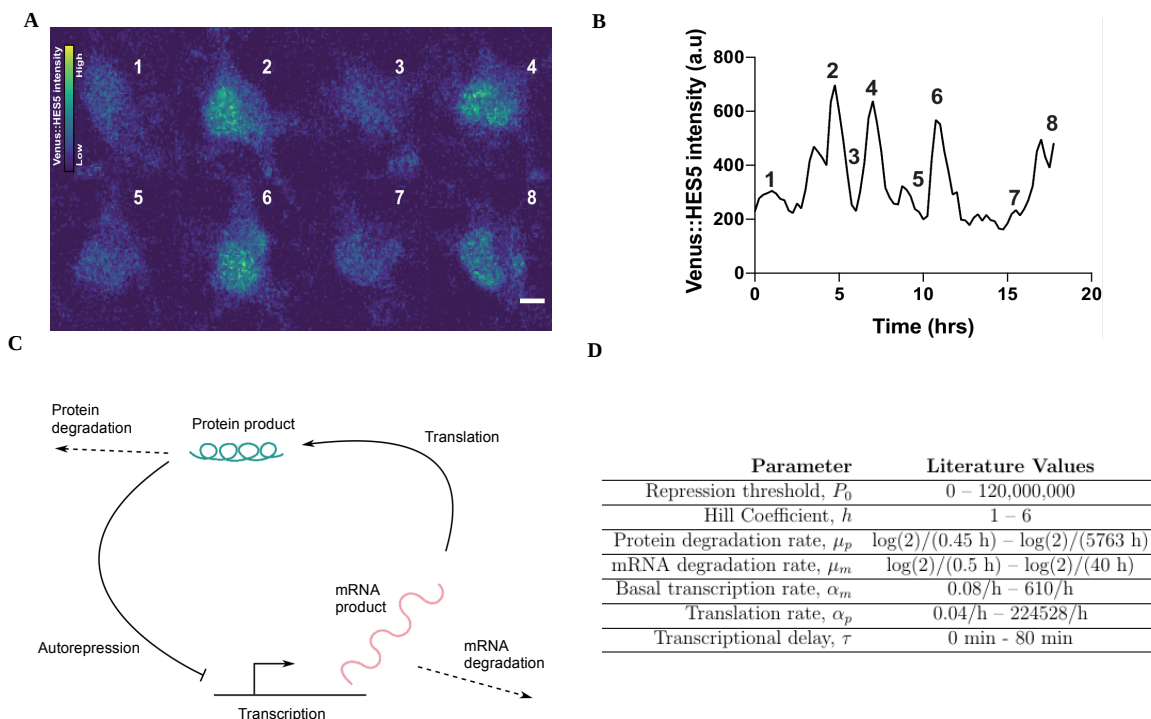

**Figure 1: Time series data of protein expression can be modelled with an auto-negative feedback motif.** **A.** Stills from a movie of a single cortical neural progenitor *in vitro* with Venus::HES5 knock-in reporter. Colour bar shows Venus::HES5 intensity. Stills taken at time points 1.75h (1), 4.5h (2), 6h (3), 7h (4), 9.5h (5), 10.75h, (6), 15.5h (7), 17.25h (8). Scale bar 5 $\mu$ m. **B.** Venus::HES5 intensity time series of cell in A. **C.** Graphical representation of the auto-negative feedback motif. **D.** Model parameter values taken from previously published experiments and theoretical considerations. [2;8;19–23].

The need for parameter estimation in biological systems has motivated extensive research in recent years, with a variety of approaches being developed for different types of data [24–27]. Techniques using Bayesian inference have emerged as a preferred approach due to their ability to deal with noisy data, a common feature of biological experiments [28], and their characterisation of parameters as distributions, rather than point estimates [20;29–35]. Placing probability distributions over our parameters, rather than treating them as point estimates, allows us not only to determine the most likely values for each of the parameters, given some data, but also to quantify our uncertainty

in them.

To achieve parameter estimation with uncertainty quantification, Bayesian inference aims to identify the posterior distribution of the model under consideration, denoted  $\pi(\boldsymbol{\theta} \mid \mathbf{y})$ , where  $\boldsymbol{\theta}$  and  $\mathbf{y}$  are the model parameters and observed data respectively. The posterior distribution describes the probability of the model parameters given observed data, and can be calculated using Bayes' rule

$$\begin{aligned}\pi(\boldsymbol{\theta} \mid \mathbf{y}) &= \frac{\pi(\mathbf{y} \mid \boldsymbol{\theta})\pi(\boldsymbol{\theta})}{\pi(\mathbf{y})} \\ &\propto \pi(\boldsymbol{\theta})\pi(\mathbf{y} \mid \boldsymbol{\theta}).\end{aligned}\tag{1}$$

Here,  $\pi(\mathbf{y} \mid \boldsymbol{\theta})$  is referred to as the likelihood, and is a measure of the fit of a statistical model to the observed data, given specific values of the model parameters. The prior probability,  $\pi(\boldsymbol{\theta})$ , is a distribution which outlines one's beliefs in the parameters  $\boldsymbol{\theta}$  before any new data is taken into account. These prior distributions can be informed using published data (Figure 1D), as well as physical constraints (e.g. rate constants must be positive). To visualise the posterior distribution and use it in further analysis it is common to work with computationally generated samples from this distribution. Posterior probabilities may be difficult to compute directly, hindering the efficient generation of these samples<sup>[36;37]</sup>.

Specifically, it may not be possible to calculate posterior probabilities if the likelihood of the model is not available. In these cases, Approximate Bayesian Computation (ABC) can be used. However, ABC reduces the data to a small number of summary statistics, which inevitably decreases the accuracy of inference<sup>[38]</sup>. If an expression for the likelihood is available and can be calculated at given parameter points, the calculation of the marginal likelihood  $\pi(\mathbf{y})$  often poses a further challenge in Bayesian inference, since it may require the numerical integration of the likelihood and prior probability. To overcome this challenge, sampling from the exact posterior distribution can be achieved using Markov chain Monte Carlo (MCMC) techniques, such as the Metropolis-Hastings random walk<sup>[39]</sup>.

MCMC methods can produce samples from the posterior distribution  $\pi(\boldsymbol{\theta} \mid \mathbf{y})$  even if the

integration factor  $\pi(\mathbf{y})$  is unknown. In many scenarios, the reconstruction of a posterior distribution using MCMC sampling can be slow, in particular if the parameter space is high-dimensional, if the calculations of the likelihood are computationally expensive, or if parameters are highly correlated within the posterior distribution<sup>[40]</sup>. In these scenarios, more efficient Hamiltonian Monte Carlo (HMC) or Metropolis-adjusted Langevin algorithm (MALA) methods are preferable<sup>[41–43]</sup>. HMC and MALA algorithms additionally require the gradient of the posterior probability with respect to the model parameters and can result in orders-of-magnitude faster convergence of the sampled distribution to the posterior distribution, especially for high-dimensional distributions or when parameter correlations are present<sup>[42;44]</sup>.

For time series data specifically, a common approach to calculating the likelihood is the Kalman filter. The Kalman filter is an algorithm which calculates the likelihood of the data at each time point, given a Markovian dynamics model and an observation noise model. It is a powerful method to calculate posterior probabilities if delays are not present in the model<sup>[45]</sup>, and can be extended to estimate the gradient of the likelihood function, making gradient-based sampling of the posterior distribution possible<sup>[46]</sup>.

A number of recent methods focus specifically on time series of gene expression<sup>[2;26;47–51]</sup>. For the study of oscillatory gene expression, a wide array of studies discuss time series data of protein concentrations, such as in Figure 1A,B, as well as the description of these data through the auto-negative feedback motif (Figure 1C). Despite this, a reliable Bayesian inference method for this popular combination of data and model is still missing. Since the model includes delays, the widely-used Kalman filter approaches are not applicable. Recently, [Calderazzo et al. \(2018\)](#) have addressed this problem by identifying a method to introduce delays into the Kalman filter<sup>[52]</sup>, indicating that accurate Bayesian inference for the auto-negative feedback motif on time series data of gene expression may be possible. However, this approach lacks the ability to calculate gradients of the posterior probability distribution, thus preventing the use of efficient gradient-based sampling methods. Furthermore, the method by [Calderazzo et al. \(2018\)](#) has not yet been applied to the auto-negative feedback motif (Figure 1C).

Here, we present a Bayesian inference pipeline that can be used as a non-invasive method to

measure kinetic parameters of gene expression emerging from the auto-negative feedback motif using protein expression time course data. We extend the Kalman filtering method presented by [Calderazzo et al. \(2018\)](#) by introducing a recursive implementation to calculate the gradient of the likelihood. This enables us to embed the non-linear delay-adapted Kalman filter into a state-of-the-art MALA sampling algorithm. This extension enhances the robustness of the inference, making it more suitable for use in typical experimental settings.

Our method is able to capture multiple kinetic parameters of gene expression simultaneously using time course data from single cells, and outperforms previous approaches. We demonstrate the accuracy of our method on *in silico* data, provide an example on how the method can be applied to experimental data, and show how the method can be used to obtain experimental design recommendations. This work is paving the way for the use of Bayesian inference methods for the investigation of gene expression dynamics and their links to cell fate.

## 2 Methods

In this section we give an overview of the key components of our method. First, we introduce the mathematical model for the auto-negative feedback motif. Then, we discuss how we use a delay-adapted non-linear Kalman filter to approximate the likelihood function. We briefly describe our implementation of two MCMC methods, Metropolis-Hastings random walk (MH) and MALA. Lastly, we provide all relevant details on the data collection and processing. Descriptions of our method that require longer derivations are provided in the Supplementary Information. This includes our proposed algorithm to compute the gradient of the likelihood function, which is a major technical advancement in this paper. The availability of this gradient enables the use of a wider range of MCMC samplers, such as MALA, which we use throughout the paper.

### 2.1 The negative feedback chemical reaction network

Here we consider a widely used model of gene expression, that incorporates knowledge of the auto-repressive negative feedback loop (Figure 1C). Our model describes both protein and mRNA expression dynamics over time at the level of a single cell, accounting for transcription and translation,

as well as degradation. We include a delay in the model, representing the time taken from the initiation of transcription until the production of a transcript and its removal from the nucleus. We further account for the effect of transcriptional auto-repression, where a high abundance of the target protein inhibits transcription of the mRNA [22;23;53].

Let  $p(t)$  and  $m(t)$  define the number of protein and mRNA molecules, respectively, at time  $t$  for a gene of interest. Gene expression is often subject to stochastic effects due to finite molecule numbers. To reflect this we model the system with delayed Chemical Langevin Equations [54–56],

$$\frac{dm}{dt} = \alpha_m f(p(t - \tau)) - \mu_m m + \sqrt{\alpha_m f(p(t - \tau)) + \mu_m m} \xi_m, \quad (2)$$

$$\frac{dp}{dt} = \alpha_p m - \mu_p p + \sqrt{\alpha_p m + \mu_p p} \xi_p, \quad (3)$$

where  $\xi_m, \xi_p$  denote Gaussian white noise, i.e.

$$\langle \xi_m(t_1) \xi_m(t_2) \rangle = \delta(t_1 - t_2),$$

$$\langle \xi_p(t_1) \xi_p(t_2) \rangle = \delta(t_1 - t_2),$$

$$\langle \xi_m(t_1) \xi_p(t_2) \rangle = 0,$$

where  $\delta(\cdot)$  is the Dirac-delta function.

The parameters  $\mu_m, \mu_p, \alpha_m$ , and  $\alpha_p$  describe the rate of mRNA degradation, protein degradation, basal transcription rate in the absence of protein, and translation rate respectively. The transcriptional delay is given by  $\tau$ , and auto-repression is taken into account via the use of a Hill function

$$f(p(t - \tau)) = \frac{1}{1 + [p(t - \tau)/P_0]^h}, \quad (4)$$

reducing the rate of transcription for increasing amounts of protein  $p$  at time  $t - \tau$  [57]. Here,  $\tau$ , the time delay, is the duration of the transcription process. The Hill function (eq. (4)) is close to one when the protein at time  $t - \tau$  is much less than the repression threshold  $P_0$  and close to zero when the the protein at time  $t - \tau$  is much more than the repression threshold. The steepness of the transition from one to zero can be regulated by the Hill coefficient  $h$ . The Hill coefficient reflects



the extent of cooperativity between ligand binding sites for the gene of interest<sup>[58]</sup>.

We simulate these dynamics using the Euler-Maruyama method with a time step  $\Delta t = 1$  min, which is chosen sufficiently small to ensure numerical accuracy of the scheme.

## 2.2 The likelihood function can be evaluated through Kalman filtering

The Kalman filter is an algorithm which calculates the likelihood function for linear stochastic differential equations describing time-series data<sup>[59]</sup>. The Kalman filter evaluates the likelihood of each time-point recording consecutively. The full likelihood is then the product of these individual likelihoods, exploiting the Markov property of the underlying stochastic process. The Kalman filter can be extended to non-linear dynamical systems by using piecewise-linear Gaussian approximations<sup>[60]</sup>.

Here, we implement a Kalman filter, extended to account for non-linearity and delay, in order to evaluate the likelihood that our observed data results from the model in eqs. (2) and (3) at a given parameter combination. This likelihood can then be used to infer model parameters for a given experimentally observed time series recording of gene expression. The resulting posterior distribution may then represent testable predictions on the biophysical characteristics of the gene of interest, such as transcription, translation, and degradation.

Our Kalman filter implementation uses a finer discretisation on the time axis than that given by the observation interval. Specifically, we introduce  $z$  hidden states between consecutive observations. Introducing such hidden states is common when applying Kalman filters to non-linear stochastic differential equations. It increases the accuracy of a piece-wise linear Gaussian approximation. In the following, the time variable  $t$  will assume integer values numbering all discretisation time points, i.e.  $t = 0, 1, \dots, nz$ , where  $n$  is the total number of observations.

It is possible to show that the likelihood of a set of observations given specific model parameters can be expressed as<sup>[52]</sup>

$$\pi(\mathbf{y} \mid \boldsymbol{\theta}) = \prod_{i=0}^{n-1} \phi(y_{i \cdot z}; F \rho_{i \cdot z}, F P_{i \cdot z} F^T + \Sigma_{\epsilon}), \quad (5)$$

where the subscript  $i \cdot z$  denotes multiplication of  $i$  and  $z$  and

$$\phi(x; \mu, \Sigma) = \frac{1}{\sqrt{\det(2\pi\Sigma)}} \exp\left(-\frac{1}{2}(x - \mu)^T \Sigma^{-1}(x - \mu)\right)$$

is the multivariate Normal distribution. The true, unobserved state of the system at time  $t$  is given by  $\mathbf{X}(t) = x_t = [m(t), p(t)]^T$ , and the relationship between  $x_t$  and the observed data  $y_t$  is given by  $y_t = Fx_t + \epsilon_t$ , where  $\epsilon_t \sim \mathcal{N}(0, \Sigma_\epsilon)$  and  $F$  is a  $1 \times 2$  matrix. Thus,  $F$  and  $\epsilon$  represent our measurement model. The value  $\Sigma_\epsilon$  is called the measurement variance, and describes the observation noise introduced through the experimental measurement process. The variables  $\rho$  and  $P$  represent the *state space mean* and *state space variance* respectively. We define  $y_{0:t} = [y_0, y_z, y_{2z}, \dots, y_t]^T$ , and write  $\rho_t = \mathbb{E}[\mathbf{X}(t) \mid y_{0:t-1}]$  and  $P_t = \text{Cov}(\mathbf{X}(t), \mathbf{X}(t) \mid y_{0:t-1})$ .

The Kalman filter calculates  $\rho_t$ , and  $P_t$  in eq. (5) using an iterative process with two main steps. At iteration  $k$ , the first  $k$  observations have been used to infer a probability distribution over the true state of the system  $\mathbf{X}(t)$  for all discretisation time points up to  $t = kz$ . This probability distribution is characterised by its mean  $\rho_{kz}^* = \mathbb{E}[\mathbf{X}(t) \mid y_{0:kz}]$  and covariance  $P_{kz}^* = \text{Cov}(\mathbf{X}(t), \mathbf{X}(t) \mid y_{0:kz})$ .

In the Kalman filter *prediction step* we then use the model to calculate the predicted probability distribution for protein and mRNA copy numbers at the next observation time point,  $\mathbf{X}((k+1)z)$ . We use this prediction to evaluate the likelihood of the observed data at the  $k+1$  observation time point. Before the prediction for the next observation is made, the Kalman filter *update step* is applied, in which the probability distribution of the state space up to observation  $k+1$  is updated to take the measurement at  $t = (k+1)z$  into account.

For our update step we derive an expression for the mean and variance of the state space distribution  $\pi(x_{t-\tau:t} \mid y_{0:t})$ , denoted  $\rho_{t-\tau:t}^*$  and  $P_{t-\tau:t}^*$  respectively. That is, the likelihood of our state space estimates from the past time  $t - \tau$  to the current time,  $t$ , given all of our current observations. This is necessary in order to accurately predict the state space distribution at the next observation time point,  $\pi(x_{t+\Delta t} \mid y_{0:t})$ , as past states can affect future states due to the presence of delays. We provide detailed derivations of our Kalman filter prediction and update steps in the Supplementary Information Section S.1.

## 2.3 Implementation of MCMC sampling algorithms

The aim of our inference algorithm is to generate independent samples from the posterior distribution,  $\pi(\boldsymbol{\theta} \mid \mathbf{y})$ . In this paper, we compare results from two different sampling methods, MH and

MALA. The MH algorithm and MALA are two of the most widely used MCMC methods for drawing random samples from a probability distribution. For completeness, we provide their algorithms in the Supplementary Information Sections S.2 and S.3.

Drawing proposals using MALA requires the calculation of the gradient of the log-posterior  $U(\theta)$ , which we outline in Section S.4. This is achieved by iteratively computing the derivatives of state space mean,  $\rho_t$ , and state space variance,  $P_t$ , with respect to each parameter, as detailed in Section S.5.

## 2.4 Trends in the data are identified by Gaussian processes

Before applying our inference method we detrend protein expression time series using Gaussian process regression, in order to identify and exclude data that show significant long-term trends<sup>[61;62]</sup> (see Section 3.3 for further motivation). Specifically, we make use of a *scaled* squared exponential Gaussian process combined with white noise, whose kernel is given by

$$k(t, t') = \gamma \exp \left( \frac{-\|x(t) - x(t')\|^2}{2l^2} \right) + \eta \delta(t - t'), \quad (6)$$

where  $\|x(t) - x(t')\|$  is the Euclidean distance between  $x(t)$  and  $x(t')$ ,  $l$  is the lengthscale, and  $\gamma, \eta \in \mathbb{R}$ . In the Gaussian process regression the hyperparameters  $\gamma$ ,  $l$ , and  $\eta$  are found using constrained optimisation.

The initial value of the lengthscale is 1000 minutes, and is bounded uniformly in the range (1000 min, 2000 min). The lower bound of this range, 1000 minutes, was chosen to ensure that detrending does not perturb ultradian dynamics in the data. The upper bound, 2000 minutes, was chosen sufficiently large to ensure that detrending is not affected by it. The initial value of the parameter  $\gamma$  is the variance of the data,  $\sigma_{\text{data}}^2$ , and is restricted by a uniform prior to  $(0.1\sigma_{\text{data}}^2, 2\sigma_{\text{data}}^2)$ . The parameter  $\eta$  has initial value 100, and is restricted by a uniform prior to  $(10^{-5}, \sigma_{\text{data}}^2)$ . Here,  $x(t)$  and  $x(t')$  represent our protein expression time course data at time  $t$  and  $t'$  respectively. We identified data without a significant long term trend manually by visual inspection (see Section 3.3, Figure 4) and removed any residual trend before applying our inference method.

## 2.5 Oscillation quality is quantified by the coherence measure

In the presence of noise, time series can exhibit oscillations of varying quality. Here we introduce a measure to quantify the oscillatory properties of a time series, the coherence. We define coherence as the area under the power spectrum,  $f(\omega)$ , within a 20% band around the peak frequency, divided by the total area under the curve, following previous approaches<sup>[8;63]</sup>. The power spectrum is defined by

$$f(\omega) = \langle \hat{p}(\omega) \hat{p}^*(\omega) \rangle,$$

where  $\hat{p}(\omega)$  is the Fourier transform of the individual protein expression time course data, and  $*$  denotes complex conjugation. Values of the coherence around zero suggest a lack of any periodic behaviour, and values around one suggest sine-wave-like behaviour. For *in silico* data we estimate coherence by averaging the power spectra from 200 traces, which individually were simulated for 8500 minutes. The initial 1000 minutes of the simulation were discarded, and not used in the averaging, to minimise any influence from the initial conditions.

## 2.6 Data collection and analysis

### 2.6.1 Imaging of Primary NS cells

To generate data in Figure 1A, primary NS cells were isolated from the dissected cortex of E12.5 Venus::HES5 embryos<sup>[1]</sup> and cultured as previously described<sup>[64]</sup>. 200,000 cells up to passage 15 were plated on laminin (Sigma, UK) coated 35mm glass-bottom dishes (Greiner-Bio One) and imaged in NS proliferation media at 37°C in 5% CO<sub>2</sub> using a Plan Fluor 40x 1.3NA oil objective on an Nikon A1-R inverted confocal microscope. A 25µm  $z$ -range was used to ensure cells maintained in focus. Maximum projections in  $z$  direction were generated before manual cell tracking using Imaris spot function (Bitplane).

### 2.6.2 Conversion of Venus::HES5 intensity to molecule number

Here, we briefly describe how we translate time series of fluorescent intensity from Manning et al. (2019) into time series of molecule numbers. Throughout our analysis, we use time series data of fluores-

cent intensity that were published by Manning et al. (2019) and which have been corrected for (i) photobleaching and (ii) for weaker intensity signals at deeper  $z$ -positions of the imaged nuclei. A quantile-quantile plot was generated between the distribution of tracked Venus::HES5 intensities and the distribution of nuclear Venus::Hes5 concentrations across the tissue. The distribution of tracked Venus::Hes5 intensities was generated from cells in tissues with heterozygous Venus::Hes5 reporter. All recorded single cells at all time points were used. The distribution of nuclear Venus::HES5 concentrations was generated using fluorescent correlation spectroscopy (FCS) on cells in tissue slices from the same domain of the E10.5 spinal cord and with a homozygous Venus::Hes5 reporter. Data from multiple tissue slices and multiple experiments was used. The required FCS data was also published by Manning et al. (2019). Linear regression on the quantile-quantile plot was used to generate a calibration curve between Venus::HES5 intensity and Venus::HES5 concentration over the middle 90% of the range. The gradient of the line was used as a scaling factor and applied to the intensity values in the Venus::HES5 expression time-series to transform intensity to concentrations. Finally, the average nuclear volume from Manning et al. (2019) was taken into account to convert concentrations into nuclear molecule numbers.

### 3 Results

Single cells in a seemingly homogeneous population can change cell fate based on gene expression dynamics. The control of gene expression dynamics can be understood with the help of mathematical models, and by fitting these models to experimentally measured data. Here, we analyse our new method for parameter inference on the widely used auto-negative feedback motif, which can be used to perform inference on single-cell time series data of gene expression. We first validate our method by showing the performance of our algorithm on *in silico* data sets. We then demonstrate the utility of our method by applying it to experimentally measured data and, finally, use our method to analyse how parameter uncertainty may depend on properties of the data, as well as the experimental design.

### 3.1 Sampled posterior distributions agree with analytical derivations for one-dimensional parameter inference.

We first test our inference method on *in silico* data from the forward model of the auto-negative feedback motif (Figure 1C). This is done using Chemical Langevin Equations, as detailed in Section 2.1. Specifically, we emulate an *in silico* imaging experiment by selecting simulated data in sparse intervals of  $\Delta t_{\text{obs}}$  mins and mimic measurement noise by adding random perturbations to each observation time point (Figure 2A). These perturbations are drawn from a Gaussian distribution with variance  $\Sigma_{\epsilon}$ . Testing the method on *in silico* data first is beneficial, since ground truth parameter values are known *a priori* for the generated *in silico* data sets, and can be compared to the obtained posterior distributions.

We start by applying our inference method to simple test cases, where the true values of all but one parameter are known, and only the remaining, unknown, parameter value is inferred (Figure 2). This allows us to compare our sampled posterior distributions to the exact likelihood, which can be calculated in these one-dimensional examples using equation eq. (5). If our inference method is accurate, the sampled posterior distribution should closely match the exact likelihood if the Markov chain has converged (see Section S.7). We find that this is indeed the case for example *in silico* data sets (Hill coefficient, transcription rate and transcriptional delay in Figure 2B–D, repression threshold and translation rate in Figure S1). Additionally, ground truth parameter values lie well within the support of the posterior distribution (Figure 2B–D, supplementary Figure S1, vertical black lines).

Our proposed inference method uses the MALA sampler, which relies on calculating likelihood gradients (see Section S.4). The comparison with exact calculations in Figure 2B–D and supplementary Figure S1 validates our implementation of MALA, and the associated computations of the likelihood gradient. In order to further test our implementation of MALA, and the associated computations of the likelihood gradients, we compare our results to posterior distributions sampled using the MH algorithm, which does not require gradient calculations. Despite the known slower convergence of the MH algorithm, this comparison is feasible for one-dimensional posterior distributions, which typically can be well approximated with a few thousand samples. The sam-

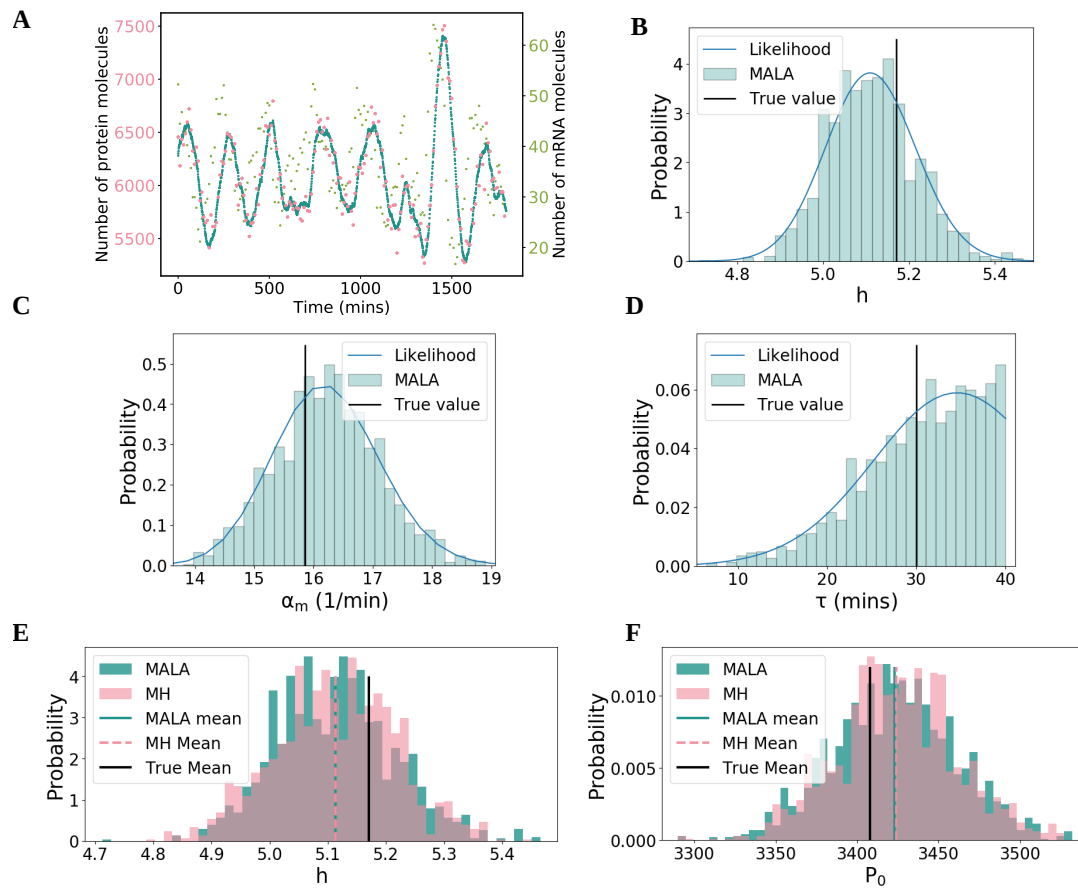

**Figure 2: Our algorithm accurately samples posterior distributions.** **A.** Simulated experimental data. Protein copy numbers are simulated using the Chemical Langevin Equation (see Section 2, blue dots). Experimental observations are emulated every five minutes by adding Gaussian noise to the protein copy number (pink). The parameter values used were  $P_0 = 3407.99$ ,  $h = 5.17$ ,  $\mu_m = \log(2)/30$ ,  $\mu_p = \log(2)/90$ ,  $\alpha_m = 15.86$ ,  $\alpha_p = 1.27$ ,  $\tau = 30$ , and the simulated mRNA copy numbers are also included (green dots). **B, C, D.** Posterior distribution for one-dimensional inference. For individual model parameters, posterior distributions were inferred while keeping all other parameters fixed, respectively. Shown above are the inferred marginal posteriors for the Hill coefficient (B), transcription rate (C), and transcriptional delay (D) respectively as histograms, using MALA as the underlying sampling algorithm (see Section S.2) for 2500 iterations. The blue lines are the exact likelihood calculations. The sampled and exact distributions coincide. **E, F.** Histograms for both MALA and MH on the 1-dimensional problem for the Hill coefficient (E) and repression threshold (F).

pled means have a relative difference below 0.03%, and the standard deviations fall within 4% of each other (Table 1, supplementary Table S2). This comparison reveals that posterior distributions from both samplers agree well with each other (Figure 2E–F, Figure S2), and further validates the implementation of the individual likelihood gradients.

| Parameter                   | True Value | $\mu$ (MALA) | $\mu$ (MH) | $\sigma$ (MALA) | $\sigma$ (MH) |
|-----------------------------|------------|--------------|------------|-----------------|---------------|
| Repression threshold, $P_0$ | 3408       | 3422         | 3423       | 37.51           | 36.65         |
| Hill Coefficient, $h$       | 5.17       | 5.113        | 5.112      | 0.100           | 0.104         |

Table 1: The true values for the parameters which were used to generate the data in Figure 3A, alongside the means,  $\mu$ , and standard deviations,  $\sigma$  of the corresponding one-dimensional posterior distributions, from both the MALA and MH algorithms (Figure 2E,F).

### 3.2 Our method allows for simultaneous inference of multiple model parameters

Having validated the method on one-dimensional posterior distributions, we further test the performance of the method by simultaneously inferring multiple model parameters from a single *in silico* data set and comparing the resulting posterior distribution to the ground truth parameter combination (Figure 3A,B). Since we cannot measure convergence of the sampled posterior through comparison to the true posterior distribution in the multi-dimensional case, we rely on typical MCMC convergence diagnostics (Section S.7).

We choose a data set that shares characteristics with typically collected time course data from single cells. Specifically, our *in silico* data set is of similar length and observation intervals as previously analysed by Manning et al. (2019). In this paper, the degradation rates of protein and mRNA have been measured, so we assume these measurements as known values, leaving five unknown parameter values to infer. The prior distributions were uniform, defined by the range of values given in Table S1, and log-uniform for  $\alpha_m$  and  $\alpha_p$  (see Section S.6 for details).

We find that the marginal posterior means, i.e. values of largest probability, all lie within maximally half a standard deviation of the ground truth values (Table 2). This indicates that a high degree of accuracy in the inference can be achieved with the amount of data typically gathered from a single cell.

Simultaneous inference of multiple parameters further allows for the investigation of pairwise



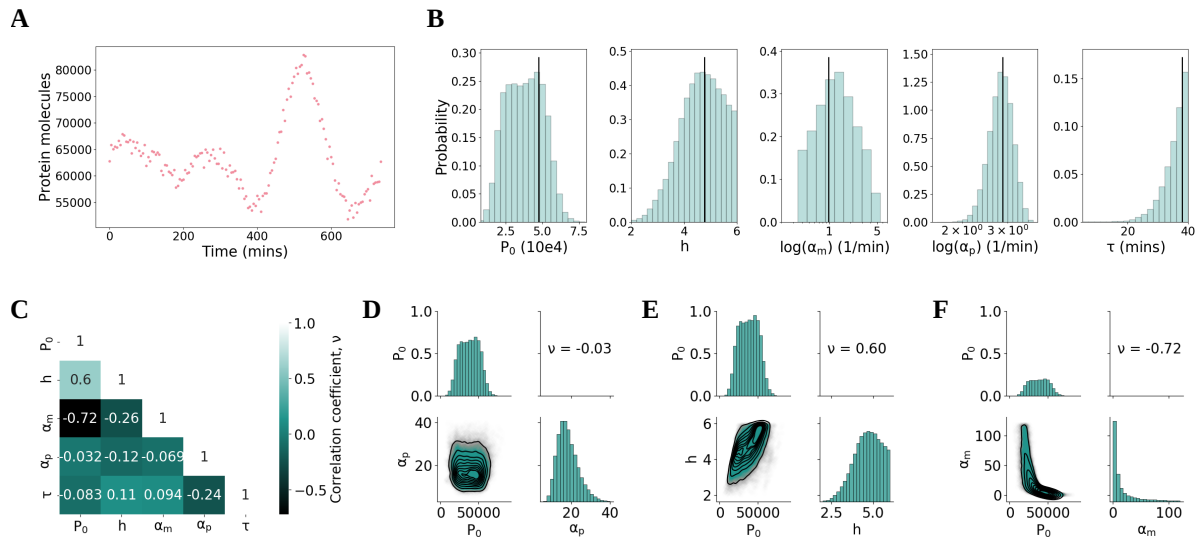

**Figure 3: MCMC sampling enables simultaneous inference of multiple parameters** **A.** An *in silico* data set generated using parameter values  $P_0 = 47515$ ,  $h = 4.77$ ,  $\mu_m = \log(2)/30$ ,  $\mu_p = \log(2)/90$ ,  $\alpha_m = 2.65$ ,  $\alpha_p = 17.61$ ,  $\tau = 38.0$ . **B.** Our method is applied to the data set in (A) to sample the joint posterior distribution over five parameters. The marginal posteriors for each parameter are shown. All marginal posterior means are within half a standard deviation of the true value. **C.** A (symmetric) correlation matrix which shows the correlation coefficient,  $\nu$ , between samples for each pair of parameters. Diagonal entries are, by definition, perfectly correlated ( $\nu = 1$ ), and off diagonal entries take values in the range  $[-1, 1]$ . **D,E,F.** Joint posterior distributions showing the relationship between different pairs of parameters. D shows the repression threshold,  $P_0$  is not correlated with the protein translation rate,  $\alpha_p$ . E shows a correlation of  $\nu = 0.6$  between the repression threshold and the Hill coefficient,  $h$ . In other words, for this data set, a higher Hill coefficient indicates a higher repression threshold (and vice-versa). Finally, F shows the strong negative correlation between  $P_0$  and  $\alpha_m$ .

| Parameter                                      | True Value | Mode  | SD    |
|------------------------------------------------|------------|-------|-------|
| Repression threshold, $P_0$                    | 47515      | 44915 | 12434 |
| Hill Coefficient, $h$                          | 4.77       | 4.41  | 0.80  |
| Log basal transcription rate, $\log(\alpha_m)$ | 0.975      | 1.45  | 1.24  |
| Log translation rate, $\log(\alpha_p)$         | 2.869      | 2.808 | 0.288 |
| Transcriptional delay, $\tau$                  | 38.0       | 39.87 | 4.39  |

**Table 2:** The true values for the parameters which were used to generate the data in Figure 2A, alongside the means,  $\mu$ , and standard deviations,  $\sigma$ , from the MALA.

parameter correlations, using correlation coefficient  $\nu$  (Figure 3C). Pairwise correlations provide crucial information on how posterior distributions can be constrained further. Specifically, the strong

correlation between the repression threshold,  $P_0$ , and the logarithm of the basal transcription rate,  $\log(\alpha_m)$  (Figure 3E), highlights that the data in Figure 3A is consistent with either high repression thresholds and low transcription, or vice versa. Such strong pairwise correlations (Figure 3E,F) imply that gaining new information on one of the two parameters would constrain the other. This is not the case when parameters are uncorrelated, such as the transcriptional delay and the translation rate (Figure 3D), and experimentally measured values on either of these parameters would not inform the other.

### 3.3 Parameter inference on single cell data outperforms previous approaches and may reveal underlying mechanisms for population heterogeneity

Next, we seek to evaluate the performance and utility of our method by applying it to experimentally measured data. Specifically, we investigate data on gene expression oscillations in mouse spinal cord neural progenitor cells<sup>[2]</sup>, and compare our method to results on parameter inference from ABC (Figure 4A). In this previous approach, inference was performed using population-level summary statistics of the collected time-course data. This resulted in posterior distributions with high parameter uncertainty. Specifically, the marginal posterior distributions for the Hill coefficient and the transcriptional delay were close to uniform, illustrating that the provided summary statistics did not contain sufficient information to constrain the uniform prior distribution. The remaining parameters had distinct modes. Nonetheless, parameter uncertainty was high since the spread of the posterior distribution was comparable to that of the prior<sup>[2]</sup>. Importantly, this previous approach did not allow for comparison of posterior distributions between single cells.

When applying our method to time series data from fluorescence microscopy experiments, it is necessary to address that our model of the auto-negative feedback motif cannot describe long-term trends in data. Specifically, the model of the auto-negative feedback loop considered here is designed to describe ultradian oscillations that typically have periods shorter than 10 hours<sup>[21;22;55]</sup>, and cannot describe variations in protein numbers on longer timescales, such as one would expect from a slow up- or down-regulation of the gene in the tissue. Hence, we only apply our algorithm to protein expression time series that we expect to be accurately modelled by eqs. (2) and (3) by

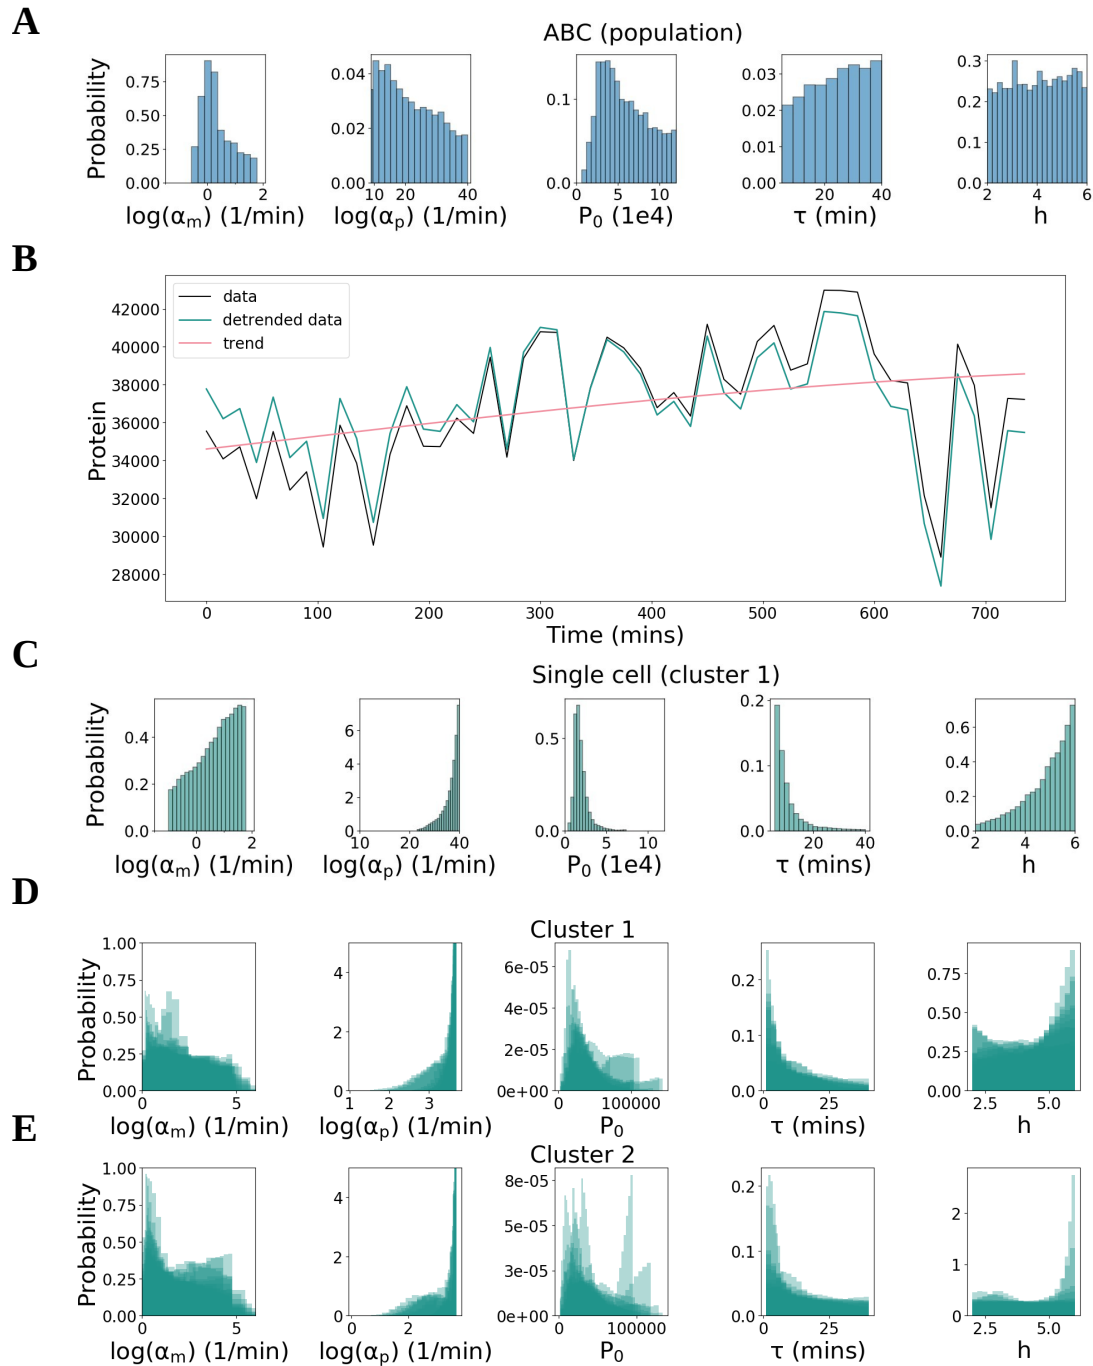

excluding data that show significant long-term trends. In order to identify such time series, we first remove trends from the time series that vary on lengthscales longer than 10 hours by using

Figure 4: **Parameter inference on single cell data outperforms previous approaches.** **A.** Marginal posterior distributions for each parameter are obtained from the ABC algorithm using summary statistics in place of likelihood evaluations. **B.** Detrending of *in vivo* single cell protein expression data (black line). The mean is subtracted from the data and a squared exponential Gaussian process determines the long term trend (pink line). This trend is removed from the data and the mean is added back in (green line). **C.** Marginal posteriors from MALA for the detrended single cell data shown in panel B. **D,E.** Marginal posterior distributions for every cell in cluster 1 and 2 respectively.

Gaussian process regression (see Section 2.4). Then, we manually identify all time series for which the detrended and raw time series visually agree (Figure 4B).

In order to identify a suitable value for the measurement variance  $\Sigma_\epsilon$  we rely on previous estimates<sup>[2]</sup>. Manning et al. (2019) decomposed the measured time series into two contributions, one from a time-varying signal with finite auto-correlation time, and one from a time-varying signal for which consecutive observations are uncorrelated<sup>[2]</sup>. This second contribution follows an identical distribution as the measurement error in our model, and was estimated to contribute 10% of the total variance across all detrended time series. Hence, we set

$$\Sigma_\epsilon = \frac{0.1}{N_c} \sum_{i=1}^{N_c} \sigma_i^2, \quad (7)$$

where  $N_c$  is the number of considered traces, and  $\sigma_i^2$  is the variance for the  $i$ th detrended data set.

We find that our method can identify more accurate posterior distributions than the previous ABC-based approach by using single cell time series of gene expression only (Figure 4C vs. Figure 4A.). For the single-cell gene expression time course in Figure 4B, we find that there is still comparatively high uncertainty on the basal transcription rate ( $\alpha_m$  in Figure 4C), as the support of the marginal posterior distribution reflects that of the uniform prior distribution. However, for all other model parameters that are inferred from this time course, the marginal posterior distributions are narrower than the prior, and than previously identified marginal posterior distributions from ABC (Figure 4C).

Having investigated marginal posterior distributions from a single cell we proceed to analyse to what extent these posterior distributions can vary across multiple cells in the population. Among the experimental data considered here, hierarchical clustering has previously identified two sub-

populations (denoted as clusters 1 and 2) which have distinct gene expression dynamics and which also do not have strong long-term trends<sup>[2]</sup>, such as down-regulation of gene expression. For clusters 1 and 2 there are 19 and 22 cells respectively which we have selected for negligible trends (see Section 2.4).

We find that the posterior distributions inferred from multiple cells share features that are conserved across all cells and both populations (Figure 4D,E). Specifically, the marginal posterior distributions of the translation rate  $\alpha_p$  are all larger than  $\exp(2)/\text{min}$ , and biased to larger values. Similarly, the marginal posterior distributions for the delay  $\tau$  cover the entire range of considered values, and are biased towards smaller values, with most likely values below 10 minutes. In contrast, for the basal transcription rates  $\alpha_m$  and the Hill coefficient  $h$ , marginal posterior distributions vary between individual cells, suggesting that there is an underlying heterogeneity of these parameters across the cell population. These observations appear to hold true for both clusters considered here.

### 3.4 Longer time course data improves accuracy of inference more effectively than more frequent sampling

Typically, longer imaging time series can only be collected at the cost of a lower imaging frequency. When designing experiments, it may be desirable to choose an imaging protocol that optimises the parameter inference towards high accuracy and low uncertainty. However, parameter uncertainty may not only be influenced by the imaging protocol, but also by the bifurcation structure of the underlying dynamical system<sup>[65]</sup>. Hence, we next analyse how posterior distributions depend on the frequency of sampling, on the length of the imaging interval, as well as the oscillation coherence of the data. The oscillation coherence is a measure for the quality of observed oscillations (Figure 5A, Section 2.5), and can be expected to reflect the position of the unknown parameter combination within the bifurcation structure of the auto-negative feedback loop<sup>[55;66;67]</sup>. To evaluate the performance of our inference, we investigate the uncertainty using the coefficient of variation,  $\text{CV}_{\theta}$  (eq. (33)), which quantifies the spread of the posterior distribution. We use this metric to quantify the performance of our inference method on a number of synthetic data sets with different lengths, sampling frequencies, and locations in parameter space.

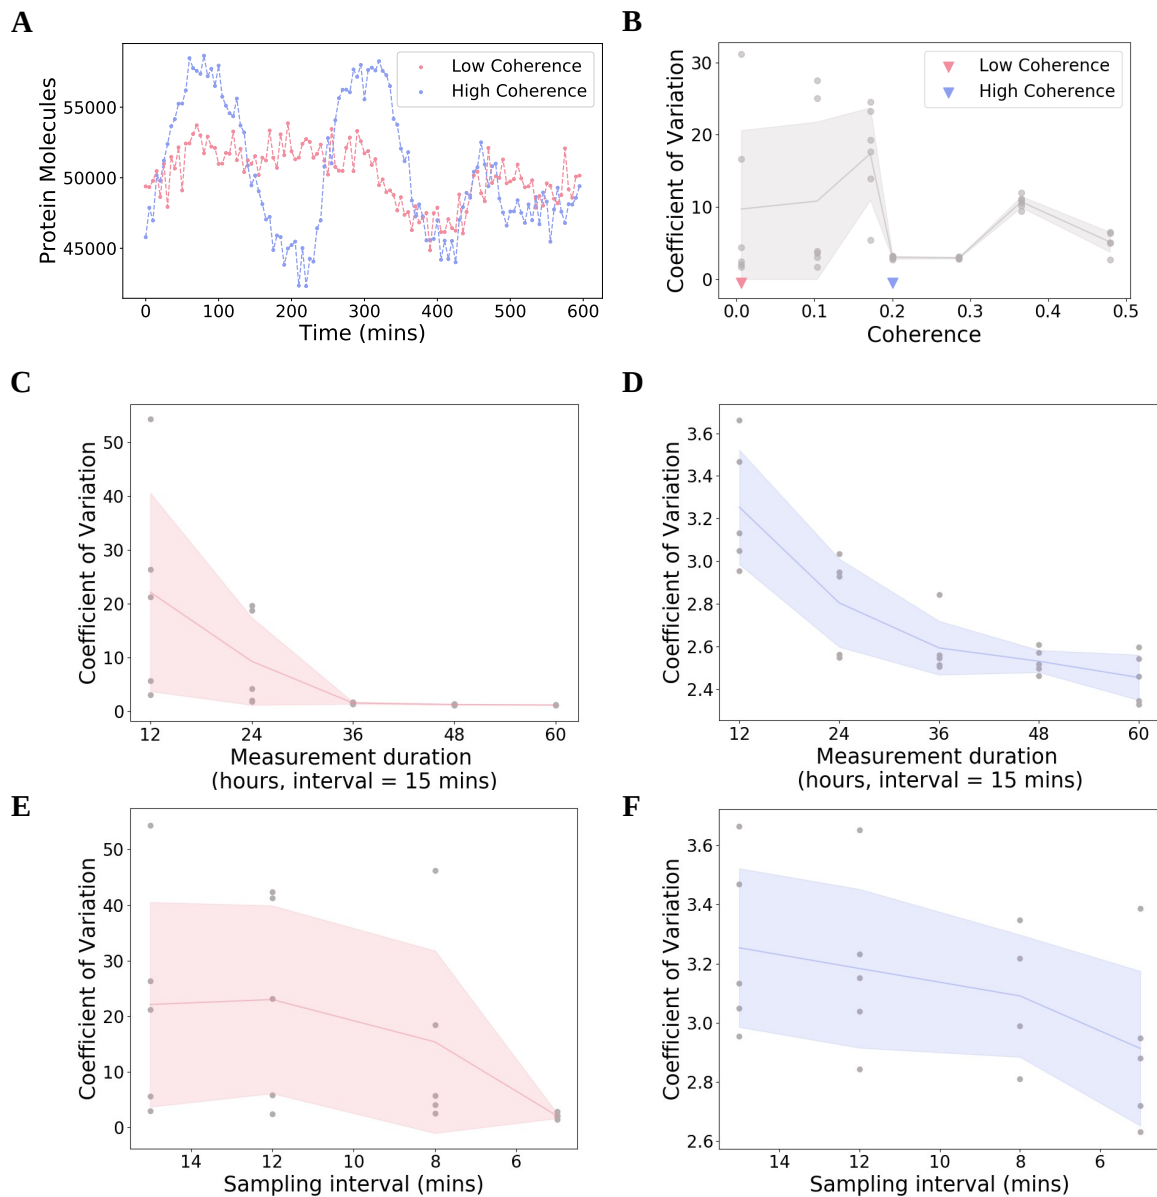

First, we investigate the dependence of our inference on oscillation coherence. To do so, we identified parameter combinations that predict different values of oscillation coherence<sup>[2]</sup>. We then performed parameter inference on multiple *in silico* data sets for each chosen parameter combination. We find that uncertainty can vary between different data sets generated from the same ground-truth parameter combination (Figure 5B). On average, uncertainty is highest for low co-

Figure 5: **Increasing the length of time course data improves inference more than increased sampling frequency.** **A.** Two examples of *in silico* protein observations, one which has low coherence (pink) and another with high coherence (purple). **B.** Values of the  $CV_{\theta}$  (see eq. (33)) for data sets spanning multiple coherence values. The grey shaded region spans one standard deviation from the mean over all datasets for each coherence value. The pink and purple triangles correspond to the low and high coherence data sets in A. **C.**  $CV_{\theta}$  for low coherence data sets sampled with different lengths, from 12 hours to 60 hours. As length increases from 12 hours to 36 hours, both the mean and standard deviation decreases by an order of magnitude. **D.** Same as C with the high coherence data sets. Whilst the trend is the same, note the different y-axis range. **E.**  $CV_{\theta}$  for low coherence data sets sampled with different frequencies. As frequency increases from 15 minutes to 5 minutes, both the mean and standard deviation decreases by an order of magnitude. **F.** Same as E with the high coherence data sets. Again, note the y-axis range.

herence values below 0.15. As coherence is increased above 0.15, parameter uncertainty decreases, as well as the variability between posterior distributions from different data sets. This suggests that higher oscillation coherence improves parameter identifiability. Intriguingly, as coherence is increased beyond 0.3, uncertainty slightly increases. We propose that this effect may reflect that highly oscillatory data may have a repetitive structure, and thus contain less information per added time interval.

We next analyse to what extent collecting data for a longer sampling duration may reduce parameter uncertainty. Since we have already found that coherence may strongly influence parameter uncertainty, we perform this analysis on two data sets that represent low and high coherence values, corresponding to high and low uncertainty, respectively (Figure 5C,D). We find that a longer sampling duration can strongly decrease parameter uncertainty. Doubling the length of the time series reduces the coefficient of variation by half on average for low coherence data and by 13% on average for high coherence data. A tripling of the available data lead to further reductions in uncertainty.

Similarly, an increase in sampling frequency also leads to a decrease in parameter uncertainty on average (Figure 5E,F). Notably, this effect is weaker than the decrease of uncertainty for longer measurement durations. Specifically, doubling the amount of data only leads to a decrease of 30% in the case of low coherence, and 5% in the case of high coherence. We find that the impact of increasing the available data either through higher sampling frequency or longer measurement duration was lower for high coherence values. This is unsurprising, given the already very low values for parameter uncertainty for high coherence data.

We find that analogous conclusions hold true if inference accuracy ( $ME_{\theta}$ , eq. (34)) is analysed, instead of uncertainty (Figure S3). Accuracy increases with oscillation coherence, longer sampling durations, and shorter imaging intervals, and longer sampling durations have a stronger effect than shorter imaging intervals.

## 4 Discussion

The aim of this work was to develop a statistical tool that can be used to infer kinetic parameters of the auto-negative feedback motif, based on typically collected protein expression time series data from single cells. Importantly, the stochastic nature of the involved processes demanded a method that enables uncertainty quantification. We have achieved our aim by embedding a non-linear delay-adapted Kalman filter into the MALA sampling algorithm. Our method can generate accurate posterior distributions for the simultaneous inference of multiple parameters of the auto-negative feedback motif. The produced posterior distributions are more informative than those from previous approaches. Since our method can be applied to data from single cells, it enables the investigation of cell-to-cell heterogeneity within cell populations. It can further be used to make experimental design recommendations, which we demonstrated by investigating how parameter uncertainty may depend on oscillation coherence, the sampling frequency, and the length of the collected time series data.

Often, new inference algorithms are presented on a single data set, and due to necessary tuning requirements of the involved sampling methods, further data sets are not considered. However, it is important to understand the behaviour of a method for a range of data sets if we wish to make experimental design recommendations. It is an achievement of this paper that we provide a method that demonstratively can reliably infer parameters, even when the size and structure of the data are changed significantly.

The mathematical model underlying our method aims to describe the dynamic expression of a protein which is controlled by auto-negative feedback. The success of our inference relies upon how well this model approximates reality. Mathematical models for the oscillatory expression of transcription factors are informed by experimental research<sup>[57;68]</sup> and have been developed over



time<sup>[3;8;22;23;66]</sup>. Existing model extensions include interactions with other genes or microRNAs<sup>[21]</sup> and future models could include effects of transcriptional bursting<sup>[69]</sup>. The simple model used here provides a starting point for developing inference algorithms for further models including non-linear, stochastic interactions as well as delays, and future validation of experimental predictions can be used to guide data-driven model improvements. To this end, our algorithm may enable model selection to identify gene regulatory network properties, such as interactions between multiple transcription factors.

Chemical Langevin Equations such as eqs. (2) and (3) approximate the full stochastic dynamics of the system by assuming Gaussian increments. Further, our Kalman filter assumes that measurement errors follow a Gaussian distribution, and are not correlated between consecutive time points. The likelihood calculations within the Kalman filter assume that distributions of protein copy numbers, which are predicted by eqs. (2) and (3), can be approximated by Gaussian distributions.

The Gaussian approximation within the Chemical Langevin Equation can break down when molecule concentrations are very low, resulting in an inaccurate simulation of the dynamics. We do not expect this to be a problem for data analysed in this paper, since protein copy numbers throughout our analysis are around 50,000 protein molecules per nucleus. In other applications, the validity of the Chemical Langevin Equation may be explicitly tested on samples from the posterior distribution by directly comparing simulated expression time series with those obtained from an exact sampling algorithm, such as the Gillespie algorithm<sup>[70]</sup>. Similarly, simulations of the Chemical Langevin Equation can be used to test assumptions on the Gaussianity of the state space made within the Kalman filter. In cases where these assumptions do not hold, alternative inference algorithms, such as particle filter methods, may need to be developed.

For Bayesian inference problems it is common to use MCMC samplers, such as MH or MALA. We have found that combining a delay-adapted non-linear Kalman filter and MALA can allow us to infer parameters of the auto-negative feedback motif. This builds on previous approaches which applied a Kalman filter in the context of a different transcriptional feedback motif with delay<sup>[52]</sup>. MCMC algorithms typically require tuning which may be data specific. We have taken steps to reduce additional input from the user by using MALA, which proposes new samples based on the

gradient of the target posterior, hence accounting for geometric properties of parameter space, and which can result in faster, more robust performance<sup>[44]</sup>. We further incorporate adaptation into our algorithm<sup>[71]</sup>. More efficient MCMC algorithms can eliminate the problem of tuning entirely<sup>[44]</sup>. These methods rely on the computation of the Hessian, i.e. the second derivative of the likelihood function. Deriving expressions for the Hessian and investigating the efficiency of the resulting algorithm is thus a potential avenue for future work.

In our applications of the algorithm to experimentally measured data, we detrended the data before applying our inference (Figure 4B). Such detrending is commonly used when analysing time series of oscillatory signals<sup>[2;72;73]</sup>. The detrending removes signal fluctuations from the recorded time series that vary on a much longer time scale than the ultradian oscillations that are being considered. This is necessary, since our model cannot describe such long-term fluctuations. Specifically, independently of the model parameter chosen, simulated traces from the Chemical Langevin Equation (eqs. (2) and (3)) do not include long-term trends. Hence, detrending prevents any bias that the presence of a long-term trend in the data may introduce to the parameter inference. When the algorithm will be applied to data from other transcription factors, we recommend to exclude data that contains trends with timescales that are longer than the fluctuations and oscillations that are expected to emerge from the auto-negative feedback, in line with previous detrending recommendations<sup>[72;73]</sup>. Presumably, variations in the long-term trend of the data stem from a time-dependence of one or multiple of the model parameters due to regulatory processes that our model does not account for. Hence, future improvements to our algorithm may be developed where the temporal variation of model parameters is inferred, instead of one static value.

When applying our inference method to experimental data (Figure 4), we relied on previously reported values for the measurement variance,  $\Sigma_\epsilon$ , in the data set that we considered<sup>[2]</sup>. When users seek to apply our algorithm to other data where previously published values are not available for  $\Sigma_\epsilon$ , this parameter can be inferred following the same procedure as reported in Manning et al. (2019).

Our algorithm opens up the investigation of research problems, such as cell-to-cell heterogeneity in dynamic gene expression, which would previously not have been accessible. In future applications, our algorithm may provide a non-invasive method to measure the kinetic parameters of the gene

of interest, such as the translation and transcription rates, or properties of the gene’s promoter, which are described by the repression threshold and Hill coefficient parameters in our model. On experimental data sets where multiple, qualitatively different dynamics are observed<sup>[74–76]</sup>, our algorithm may provide insights into the mechanistic origin of these different dynamics. To this end, it may for example be combined with clustering algorithms on the time series data, such as Gaussian mixture modelling. Since different dynamic patterns of gene expression have been observed in multiple studies of auto-repressing transcription factors<sup>[2;3]</sup>, we anticipate that these approaches will spark new scientific investigations.

Throughout, we have assumed that measurements in the form of protein copy numbers per nucleus are available over time. To collect such data, it is necessary to combine endogenous fluorescent reporters with FCS in order to translate reporter intensity values to molecule concentrations. Future versions of our algorithm may be applicable to data where FCS is not available, if one extends our measurement model ( $F$ , Section 2.2) to include an unknown, linear scaling parameter between protein copy numbers and imaged intensity values.

We highlight that the impact of this work is not limited to a single gene in a single model system. The conceptual framework and derivations described here are applicable to any system which can be described by delayed stochastic differential equations, although there may be computational limitations as model sizes increase.

## Ethics statement

Animal experimentation: All animal work was performed under regulations set out by the UK Home Office Legislation under the 1986 United Kingdom Animal Scientific Procedures Act.

## Data accessibility

All code and data used in this article are freely available on our github repository, <https://github.com/kursawe/hesdynamics>.

## Authors' contributions

J.B., C.M., M.R., N.P. and J.K. conceived the study and contributed to the manuscript. J.B. developed and implemented the algorithm, ran the simulations, performed the analysis, and produced the figures. J.K. contributed to the algorithm development. M.R., N.P. and J.K. supervised the study. J.B. and J.K. co-wrote the manuscript with input from C.M., M.R. and N.P.. C.M. provided microscopy data and FCS analysis. All authors gave final approval for publication and agree to be held accountable for the work performed therein.

## Competing interests

We declare we have no competing interests.

## Funding

This work was supported by a Wellcome Trust Four-Year PhD Studentship in Basic Science to J.B. (219992/Z/19/Z) and a Wellcome Trust Senior Research Fellowship (090868/Z/09/Z). C.M. was supported by a Sir Henry Wellcome Fellowship (103986/Z/14/Z) and University of Manchester Presidential Fellowship. M.R. was supported by the Wellcome Trust (204832/B/16/Z).

## Acknowledgements

The authors would like to acknowledge the use of the Computational Shared Facility at The University of Manchester.

## References

- [1] Imayoshi, I.; Isomura, A.; Harima, Y.; Kawaguchi, K.; Kori, H.; Miyachi, H.; Fujiwara, T.; Ishidate, F.; Kageyama, R. Oscillatory control of factors determining multipotency and fate in mouse neural progenitors. *Science* **2013**, *342*, 1203–1208.

- [2] Manning, C. S.; Biga, V.; Boyd, J.; Kursawe, J.; Ymisson, B.; Spiller, D. G.; Sanderson, C. M.; Galla, T.; Rattray, M.; Papalopulu, N. Quantitative single-cell live imaging links HES5 dynamics with cell-state and fate in murine neurogenesis. *Nature communications* **2019**,
- [3] Soto, X.; Biga, V.; Kursawe, J.; Lea, R.; Doostdar, P.; Thomas, R.; Papalopulu, N. Dynamic properties of noise and Her6 levels are optimized by miR-9, allowing the decoding of the Her6 oscillator. *The EMBO Journal* **2020**, *39*, 1–23.
- [4] Bansod, S.; Kageyama, R.; Ohtsuka, T. Hes5 regulates the transition timing of neurogenesis and gliogenesis in mammalian neocortical development. *Development* **2017**, *144*, 3156–3167.
- [5] Tan, S. L.; Ohtsuka, T.; González, A.; Kageyama, R. MicroRNA9 regulates neural stem cell differentiation by controlling Hes1 expression dynamics in the developing brain. *Genes to Cells* **2012**, *17*, 952–961.
- [6] Kobayashi, T.; Kageyama, R. *Current Topics in Developmental Biology*, 1st ed.; Elsevier Inc., 2014; Vol. 110; pp 263–283.
- [7] Purvis, J. E.; Karhohs, K. W.; Mock, C.; Batchelor, E.; Loewer, A.; Lahav, G. P53 Dynamics Control Cell Fate. *Science* **2012**, *336*, 1440–1444.
- [8] Phillips, N. E.; Manning, C. S.; Pettini, T.; Biga, V.; Marinopoulou, E.; Stanley, P.; Boyd, J.; Bagnall, J.; Paszek, P.; Spiller, D. G.; White, M. R.; Goodfellow, M.; Galla, T.; Rattray, M.; Papalopulu, N. Stochasticity in the miR-9/Hes1 oscillatory network can account for clonal heterogeneity in the timing of differentiation. *eLife* **2016**, *5*, 1–33.
- [9] Longo, D.; Hasty, J. Dynamics of single-cell gene expression. *Molecular Systems Biology* **2006**, *2*.
- [10] Soroldoni, D.; Oates, A. C. Live transgenic reporters of the vertebrate embryo’s Segmentation Clock. *Current Opinion in Genetics and Development* **2011**, *21*, 600–605.
- [11] Yang, N. et al. Quantitative live imaging of Venus::BMAL1 in a mouse model reveals complex dynamics of the master circadian clock regulator. *PLoS Genetics* **2020**, *16*, 1–24.

- [12] Pepe-Mooney, B. J.; Dill, M. T.; Alemany, A.; Ordovas-Montanes, J.; Matsushita, Y.; Rao, A.; Sen, A.; Miyazaki, M.; Anakk, S.; Dawson, P. A.; Ono, N.; Shalek, A. K.; van Oudenaarden, A.; Camargo, F. D. Single-Cell Analysis of the Liver Epithelium Reveals Dynamic Heterogeneity and an Essential Role for YAP in Homeostasis and Regeneration. *Cell Stem Cell* **2019**, *25*, 23–38.e8.
- [13] Alber, A. B.; Paquet, E. R.; Biserni, M.; Naef, F.; Suter, D. M. Single Live Cell Monitoring of Protein Turnover Reveals Intercellular Variability and Cell-Cycle Dependence of Degradation Rates. *Molecular Cell* **2018**, *71*, 1079–1091.e9.
- [14] Novák, B.; Tyson, J. J. Design principles of biochemical oscillators. *Nature Reviews Molecular Cell Biology* **2008**, *9*, 981–991.
- [15] Alon, U. *An Introduction to Systems Biology: Design Principles of Biological Circuits*, 2nd ed.; Chapman and Hall/CRC, 2019; p 342.
- [16] Chou, J.; Provot, S.; Werb, Z. GATA3 in development and cancer differentiation: Cells GATA have it! *Journal of Cellular Physiology* **2010**, *222*, 42–49.
- [17] Chang, P. J.; Hsiao, Y. L.; Tien, A. C.; Li, Y. C.; Pi, H. Negative-feedback regulation of proneural proteins controls the timing of neural precursor division. *Development* **2008**, *135*, 3021–3030.
- [18] Iwasaki, T.; Takiguchi, R.; Hiraiwa, T.; Yamada, T. G.; Yamazaki, K.; Hiroi, N. F.; Funahashi, A. Neural Differentiation Dynamics Controlled by Multiple Feedback Loops in a Comprehensive Molecular Interaction Network. *Processes* **2020**, *8*.
- [19] Schwanhüusser, B.; Busse, D.; Li, N.; Dittmar, G.; Schuchhardt, J.; Wolf, J.; Chen, W.; Selbach, M. Global quantification of mammalian gene expression control. *Nature* **2011**, *473*, 337–342.
- [20] Honkela, A.; Peltonen, J.; Topa, H.; Charapitsa, I.; Matarese, F.; Grote, K.; Stunnenberg, H. G.; Reid, G.; Lawrence, N. D.; Rattray, M. Genome-wide modeling of transcription

- kinetics reveals patterns of RNA production delays. *Proceedings of the National Academy of Sciences of the United States of America* **2015**, *112*, 13115–13120.
- [21] Goodfellow, M.; Phillips, N. E.; Manning, C.; Galla, T.; Papalopulu, N. MicroRNA input into a neural ultradian oscillator controls emergence and timing of alternative cell states. *Nature Communications* **2014**, *5*.
- [22] Monk, N. A. Oscillatory expression of Hes1, p53, and NF- $\kappa$ B driven by transcriptional time delays. *Current Biology* **2003**, *13*, 1409–1413.
- [23] Lewis, J. Autoinhibition with transcriptional delay: A simple mechanism for the zebrafish somitogenesis oscillator. *Current Biology* **2003**, *13*, 1398–1408.
- [24] Liepe, J.; Kirk, P.; Filippi, S.; Toni, T.; Barnes, C. P.; Stumpf, M. P. A framework for parameter estimation and model selection from experimental data in systems biology using approximate Bayesian computation. *Nature Protocols* **2014**, *9*, 439–456.
- [25] Babbie, A. C.; Stumpf, M. P. How to deal with parameters for whole-cell modelling. *Journal of the Royal Society Interface* **2017**, *14*.
- [26] Warne, D. J.; Baker, R. E.; Simpson, M. J. Simulation and inference algorithms for stochastic biochemical reaction networks: From basic concepts to state-of-the-art. *Journal of the Royal Society Interface* **2019**, *16*.
- [27] Browning, A. P.; Warne, D. J.; Burrage, K.; Baker, R. E.; Simpson, M. J. Listen to the noise: identifiability analysis for stochastic differential equation models in systems biology. *bioRxiv* **2020**, 2020.08.10.245233.
- [28] McAdams, H. H.; Arkin, A. It’s a noisy business! Genetic regulation at the nanomolar scale. *Trends in Genetics* **1999**, *15*, 65–69.
- [29] Toni, T.; Welch, D.; Strelkowa, N.; Ipsen, A.; Stumpf, M. P. Approximate Bayesian computation scheme for parameter inference and model selection in dynamical systems. *Journal of the Royal Society Interface* **2009**, *6*, 187–202.

- [30] Gómez-Schiavon, M.; Chen, L. F.; West, A. E.; Buchler, N. E. BayFish: Bayesian inference of transcription dynamics from population snapshots of single-molecule RNA FISH in single cells. *Genome Biology* **2017**, *18*, 1–12.
- [31] Vallejos, C. A.; Richardson, S.; Marioni, J. C. Beyond comparisons of means: Understanding changes in gene expression at the single-cell level. *Genome Biology* **2016**, *17*, 1–14.
- [32] Cao, Z.; Grima, R. Accuracy of parameter estimation for auto-regulatory transcriptional feedback loops from noisy data. *Journal of the Royal Society Interface* **2019**, *16*.
- [33] Jenkins, D. J.; Finkenstädt, B.; Rand, D. A. A temporal switch model for estimating transcriptional activity in gene expression. *Bioinformatics (Oxford, England)* **2013**, *29*, 1158–1165.
- [34] Finkenstädt, B.; Woodcock, D. J.; Komorowski, M.; Harper, C. V.; Davis, J. R.; White, M. R.; Rand, D. A. Quantifying intrinsic and extrinsic noise in gene transcription using the linear noise approximation: An application to single cell data. *Annals of Applied Statistics* **2013**, *7*, 1960–1982.
- [35] Munsky, B.; Neuert, G.; Van Oudenaarden, A. Using gene expression noise to understand gene regulation. *Science* **2012**, *336*, 183–187.
- [36] Ramachandra Murthy, K.; Singh, S.; Tuck, D.; Varadan, V. *Handbook of Statistics*, 1st ed.; Elsevier B.V., 2019; Vol. 40; pp 355–404.
- [37] Beaumont, M. A.; Zhang, W.; Balding, D. J. Approximate Bayesian computation in population genetics. *Genetics* **2002**, *162*, 2025–2035.
- [38] Fearnhead, P.; Prangle, D. Constructing summary statistics for approximate Bayesian computation: Semi-automatic approximate Bayesian computation. *Journal of the Royal Statistical Society. Series B: Statistical Methodology* **2012**, *74*, 419–474.
- [39] Hastings, W. K. Monte carlo sampling methods using Markov chains and their applications. *Biometrika* **1970**, *57*, 97–109.



- [40] Hoffman, M. D.; Gelman, A. The no-U-turn sampler: Adaptively setting path lengths in Hamiltonian Monte Carlo. *Journal of Machine Learning Research* **2014**, *15*, 1593–1623.
- [41] Duane, S.; Kennedy, A. D.; Pendleton, B. J.; Roweth, D. Hybrid Monte Carlo. *Physics Letters B* **1987**, *195*, 216–222.
- [42] Betancourt, M. A Conceptual Introduction to Hamiltonian Monte Carlo. **2017**,
- [43] Roberts, G. O.; Tweedie, R. L. Exponential Convergence of Langevin Distributions and Their Discrete Approximations. *Bernoulli* **1996**, *2*, 341.
- [44] Girolami, M.; Calderhead, B. Riemann manifold Langevin and Hamiltonian Monte Carlo methods. *Journal of the Royal Statistical Society* **2011**, *73*, 123–214.
- [45] Lillacci, G.; Khammash, M. Parameter estimation and model selection in computational biology. *PLoS Computational Biology* **2010**, *6*.
- [46] Mbalawata, I. S.; Särkkä, S.; Haario, H. Parameter estimation in stochastic differential equations with Markov chain Monte Carlo and non-linear Kalman filtering. *Computational Statistics* **2013**, *28*, 1195–1223.
- [47] Kojima, K.; Fujita, A.; Shimamura, T.; Imoto, S.; Miyano, S. Estimation of nonlinear gene regulatory networks via L1 regularized NVAR from time series gene expression data. *Genome informatics. International Conference on Genome Informatics* **2008**, *20*, 37–51.
- [48] Fan, M.; Kuwahara, H.; Wang, X.; Wang, S.; Gao, X. Parameter estimation methods for gene circuit modeling from time-series mRNA data: A comparative study. *Briefings in Bioinformatics* **2015**, *16*, 987–999.
- [49] Moles, C. G.; Mendes, P.; Banga, J. R. Parameter estimation in biochemical pathways: A comparison of global optimization methods. *Genome Research* **2003**, *13*, 2467–2474.
- [50] Clerx, M.; Robinson, M.; Lambert, B.; Lei, C. L.; Ghosh, S.; Mirams, G. R.; Gavaghan, D. J. Probabilistic Inference on Noisy Time Series (PINTS). *Journal of Open Research Software* **2019**, *7*.

- [51] Minas, G.; Momiji, H.; Jenkins, D. J.; Costa, M. J.; Rand, D. A.; Finkenstädt, B. ReTrOS: A MATLAB toolbox for reconstructing transcriptional activity from gene and protein expression data. *BMC Bioinformatics* **2017**, *18*, 1–11.
- [52] Calderazzo, S.; Brancaccio, M.; Finkenstädt, B. Filtering and Inference for stochastic oscillators with distributed delays. *Bioinformatics* **2018**,
- [53] Hatakeyama, J. Hes genes regulate size, shape and histogenesis of the nervous system by control of the timing of neural stem cell differentiation. *Development* **2004**, *131*, 5539–5550.
- [54] Gillespie, D. T. The chemical Langevin equation. *The Journal of Chemical Physics* **2000**, *113*, 297–306.
- [55] Galla, T. Intrinsic fluctuations in stochastic delay systems: Theoretical description and application to a simple model of gene regulation. *Physical Review E - Statistical, Nonlinear, and Soft Matter Physics* **2009**, *80*, 1–9.
- [56] Brett, T.; Galla, T. Gaussian approximations for stochastic systems with delay: Chemical Langevin equation and application to a Brusselator system. *The Journal of Chemical Physics* **2014**, *140*, 124112.
- [57] Hirata, H.; Yoshiura, S.; Ohtsuka, T.; Bessho, Y.; Harada, T.; Yoshikawa, K.; Kageyama, R. Oscillatory Expression of the bHLH Factor Hes1 Regulated by a Negative Feedback Loop. *Science* **2002**, *298*, 840–843.
- [58] Weiss, J. N. The Hill equation revisited: uses and misuses. *The FASEB Journal* **1997**, *11*, 835–841.
- [59] Särkkä, S. *Bayesian Filtering and Smoothing*; Cambridge University Press, 2013.
- [60] Singer, H. Parameter estimation of nonlinear stochastic differential equations: Simulated maximum likelihood versus extended kalman filter and itô-taylor expansion. *Journal of Computational and Graphical Statistics* **2002**, *11*, 972–995.

- [61] Edward Rasmussen, C.; K. I. Williams, C. *Gaussian Processes for Machine Learning*; The MIT Press, 2006.
- [62] Pedregosa, F.; Grisel, O.; Weiss, R.; Passos, A.; Brucher, M.; Varoquax, G.; Gramfort, A.; Michel, V.; Thirion, B.; Grisel, O.; Blondel, M.; Prettenhofer, P.; Weiss, R.; Dubourg, V.; Brucher, M. Scikit-learn: Machine Learning in Python. *Journal of Machine Learning Research* **2011**, *12*, 2825–2830.
- [63] Alonso, D.; McKane, A. J.; Pascual, M. Stochastic amplification in epidemics. *Journal of the Royal Society Interface* **2007**, *4*, 575–582.
- [64] Pollard, S. M. In vitro expansion of fetal neural progenitors as adherent cell lines. *Methods in Molecular Biology* **2013**, *1059*, 13–24.
- [65] Roesch, E.; Stumpf, M. P. Parameter inference in dynamical systems with co-dimension 1 bifurcations. *Royal Society Open Science* **2019**, *6*.
- [66] Momiji, H.; Monk, N. A. Dissecting the dynamics of the Hes1 genetic oscillator. *Journal of Theoretical Biology* **2008**, *254*, 784–798.
- [67] Zhuang, K.; Zhu, H. Stability and bifurcation analysis in a model of Hes1 selfregulation with time delay. *World Academy of Science, Engineering and Technology* **2010**, *43*, 469–471.
- [68] Bonev, B.; Stanley, P.; Papalopulu, N. MicroRNA-9 Modulates Hes1 Ultradian Oscillations by Forming a Double-Negative Feedback Loop. *Cell Reports* **2012**, *2*, 10–18.
- [69] Tunnacliffe, E.; Chubb, J. R. What Is a Transcriptional Burst? *Trends in Genetics* **2020**, *36*, 288–297.
- [70] Gillespie, D. T. Stochastic Simulation of Chemical Kinetics. *Annual Review of Physical Chemistry* **2007**, *58*, 35–55.
- [71] Andrieu, C.; Thoms, J. A tutorial on adaptive MCMC. *Statistics and Computing* **2008**, *18*, 343–373.

- [72] Phillips, N. E.; Manning, C.; Papalopulu, N.; Rattray, M. Identifying stochastic oscillations in single-cell live imaging time series using Gaussian processes. *PLoS Computational Biology* **2017**, *13*, 1–30.
- [73] Mönke, G.; Sorgenfrei, F. A.; Schmal, C.; Granada, A. E. Optimal time frequency analysis for biological data - pyBOAT. *bioRxiv* **2020**, 27.
- [74] D’Urso, A.; Brickner, J. H. Epigenetic transcriptional memory. *Current Genetics* **2017**, *63*, 435–439.
- [75] Elowitz, M. B.; Levine, A. J.; Siggia, E. D.; Swain, P. S. Stochastic gene expression in a single cell. *Science* **2002**, *297*, 1183–1186.
- [76] Godwin, S.; Ward, D.; Pedone, E.; Homer, M.; Fletcher, A. G.; Marucci, L. An extended model for culture-dependent heterogenous gene expression and proliferation dynamics in mouse embryonic stem cells. *npj Systems Biology and Applications* **2017**, *3*, 1–12.
- [77] Powell, M. J. D. An efficient method for finding the minimum of a function of several variables without calculating derivatives. *The Computer Journal* **1964**, *7*, 155–162.
- [78] Haario, H.; Saksman, E.; Tamminen, J. An adaptive Metropolis algorithm. *Bernoulli* **2001**, *7*, 223–242.
- [79] Roberts, G. O.; Stramer, O.; Science, A. Langevin Diffusions and Metropolis-Hastings Algorithms. *Computing* **2003**, 337–357.
- [80] Durmus, A.; Roberts, G. O.; Vilmart, G.; Zygalakis, K. C. Fast langevin based algorithm for MCMC in high dimensions. *Annals of Applied Probability* **2017**, *27*, 2195–2237.
- [81] Roberts, G. O.; Rosenthal, J. S. Optimal Scaling for Various Metropolis-Hastings Algorithms. *Statistical Science* **2001**, *16*, 351–367.
- [82] Singh, J.; Padgett, R. A. Rates of in situ transcription and splicing in large human genes. *Nature structural and molecular biology* **2009**, *16*, 1128–1133.

- [83] M. Suter, D.; Molina, N.; Naef, F.; Schibler, U. Origins and consequences of transcriptional discontinuity. *Current Opinion in Cell Biology* **2011**, *23*, 657–662.
- [84] Gelman, A.; Rubin, D. B.; Gelman, A.; Rubin, D. B. Inference from Iterative Simulation Using Multiple Sequences Linked references are available on JSTOR for this article : Inference from Iterative Simulation Using Multiple Sequences. *Statistical Science* **1992**, *7*, 457–472.
- [85] Vehtari, A.; Gelman, A.; Simpson, D.; Carpenter, B.; Bürkner, P.-C. Rank-Normalization, Folding, and Localization: An Improved R for Assessing Convergence of MCMC. *Bayesian Analysis* **2020**, 1–27.

## Supplementary Information

Here we provide full derivations for the prediction and update step in the non-linear, delay-adapted Kalman filter. We also detail the MCMC sampling algorithms discussed in the main text, as well as our chosen method for adaptive step size selection within the MCMC. Then, we show how the gradient of the likelihood can be computed within the Kalman filter. Finally we detail our process for choosing prior distributions, and assessing convergence of our Markov chains. Supplementary figures are provided at the end.

### S.1 Kalman filter prediction and update step

In order to predict the probability distribution over the state space  $\mathbf{X}$  at observation  $k$ , it is necessary to calculate  $\rho_t$  and  $P_t$  as defined in the main manuscript (Section 2.2). Here, we show how we derive delay differential equations for both quantities, closely following [Calderazzo et al. \(2018\)](#).

**Prediction Step** We first rewrite eqs. (2) and (3) in the general form of a vector-valued, delayed stochastic differential equation:

$$\begin{aligned} d\mathbf{X}(t) = & g(\mathbf{X}(t))dt + f(\mathbf{X}(t - \tau))dt \\ & + \sqrt{l(\mathbf{X}(t)) + q(\mathbf{X}(t - \tau))}dB(t), \end{aligned} \quad (8)$$

where  $B(t)$  is a 2-dimensional Wiener process, and

$$\begin{aligned} g(\mathbf{X}(t)) &= \begin{bmatrix} -\mu_m m(t) \\ \alpha_p m(t) - \mu_p p(t) \end{bmatrix}, \\ f(\mathbf{X}(t - \tau)) &= \begin{bmatrix} \alpha_m f(p(t - \tau)) \\ 0 \end{bmatrix}, \\ l(\mathbf{X}(t)) &= \begin{bmatrix} \mu_m m(t) & 0 \\ 0 & \alpha_p m(t) + \mu_p p(t) \end{bmatrix}, \end{aligned}$$

$$q(\mathbf{X}(t - \tau)) = \begin{bmatrix} \alpha_m f(p(t - \tau)) & 0 \\ 0 & 0 \end{bmatrix}.$$

Next, we aim to use this definition to derive delay differential equations for  $\rho$  and  $P$ . To do so, we employ Taylor expansions. The first order Taylor expansions of  $g(\cdot)$  and  $f(\cdot)$  about  $\rho_t$  are

$$g(X_t) \approx g(\rho_t) + J_g(\rho_t) \cdot (X_t - \rho_t),$$

and

$$f(X_{t-\tau}) \approx f(\rho_{t-\tau}) + J_f(\rho_{t-\tau}) \cdot (X_{t-\tau} - \rho_{t-\tau}).$$

We can hence write

$$X_{t+\delta_t} = X_t + g(X_t)\delta_t + f(X_{t-\tau})\delta_t + \sqrt{l(X_t) + q(X_{t-\tau})}\mathcal{N}(0, \delta_t) + \mathcal{O}(\delta_t^2), \quad (9)$$

where  $\mathcal{N}(0, \delta_t)$  is a Gaussian distribution with mean zero and variance  $\delta_t$ . Inserting this into the definition of  $\rho_t$ , we find

$$d\rho_t = g(\rho_t)dt + f(\rho_{t-\tau})dt. \quad (10)$$

Similarly, we insert eq. (9) into the definition of  $P$  to find

$$\begin{aligned} dP_t &= [J_g(\rho_t)P_t + P_t^T J_g(\rho_t)^T] dt \\ &\quad + [J_f(\rho_{t-\tau})P_{t-\tau,t}] dt \\ &\quad + [P_{t,t-\tau} J_f(\rho_{t-\tau})^T] dt \\ &\quad + A(\rho_t, \rho_{t-\tau}) dt, \end{aligned} \quad (11)$$

where  $A(\rho_t, \rho_{t-\tau}) = l(\rho_t) + q(\rho_{t-\tau})$  and  $P_{t,s} = \text{Cov}(\mathbf{X}(t), \mathbf{X}(s) \mid y_{0:t-1})$ .

Lastly, we have

$$dP_{s,t} = P_{s,t} J_g^T(\rho_t) dt + P_{s,t-\tau} J_f^T(\rho_{t-\tau}) dt. \quad (12)$$

We can then use a standard forward Euler method with a time step which represents the absolute

time difference between consecutive hidden states, to numerically integrate these delay differential equations between observations. Before the first prediction step can be executed, it is necessary to define initial and past conditions for these delay differential equations. The state space mean is initialised at negative times with the steady state solutions to the deterministic approximation of the model, i.e. eqs. (2) and (3) of the main manuscript without their respective noise terms. At steady state, we have

$$p^* = \frac{\alpha_m \alpha_p}{\mu_m \mu_p} f(p^*) \quad (13)$$

and

$$m^* = \frac{\mu_p}{\alpha_p} p^*. \quad (14)$$

The state space variance is initialised with a multiple of this mean. Specifically, the variance of the mRNA is initialised at 20 times its mean value, and the variance of the protein is initialised at 100 times its mean value. These are chosen to reflect the variance of protein and mRNA expression from the Chemical Langevin Equations. For simplicity, off-diagonal elements of the state space covariance are initialised at zero. We expect the influence of these initial and past conditions to diminish after the first update step has been applied and as the number of data points increases.

**Update Step** For our update step we derive an expression for the mean and variance of the state space distribution  $\pi(x_{t-\tau:t} | y_{0:t})$ , denoted  $\rho_{t-\tau:t}^*$  and  $P_{t-\tau:t}^*$  respectively. That is, the likelihood of our state space estimates from the past time  $t - \tau$  to the current time,  $t$ , given all of our current observations. This is necessary in order to accurately predict the state space distribution at the next observation time point,  $\pi(x_{t+\Delta t} | y_{0:t})$ , as past states can affect future states due to the presence of delays.

Assuming approximate Gaussianity of the joint distribution  $\pi(x_{t+\Delta t}, y_{t+\Delta t} | y_{0:t})$ , following Särkkä (2013), we can obtain the following expression for the updated state space mean and variance:

$$\rho_{t-\tau:t}^* = \rho_{t-\tau:t} + K_{t-\tau:t} (y_t - F \rho_t), \quad (15)$$

$$P_{t-\tau:t}^* = P_{t-\tau:t} - K_{t-\tau:t} S_t K_{t-\tau:t}^T, \quad (16)$$



$$K_{t-\tau:t} = P_{t-\tau:t,t} F^T S_t^{-1}, \quad (17)$$

where  $S_t = F P_t F^T + \Sigma_\epsilon$ .

## S.2 Markov Chain Monte Carlo sampling algorithms

For completeness, we provide here the algorithms for the Metropolis-Hasting random walk, and the Metropolis-adjusted Langevin Algorithm.

### Metropolis-Hastings Random Walk

We initialise the algorithm with a set of the model parameters,  $\theta_0$ , chosen by minimising the log likelihood function using Powell’s method<sup>[77]</sup>. In the case of our model, each parameter vector is composed as  $\theta = [P_0, h, \mu_m, \mu_p, \alpha_m, \alpha_p, \tau]^T$ . At each iteration,  $i$ , we propose a combination of parameters,  $\theta'$ , from a symmetric distribution,  $q(\cdot)$ , centered around the current parameters,  $\theta_i$ . In this paper we use the normal distribution  $\mathcal{N}(\theta, \epsilon \Sigma)$ , where  $\epsilon$  is called the step size, and  $\Sigma$  is the proposal covariance matrix. An acceptance ratio,  $\alpha(\theta_i, \theta')$ , defined by

$$\begin{aligned} \alpha(\theta_i, \theta') &= \min \left\{ 1, \frac{\pi(\theta' | \mathbf{y})}{\pi(\theta_i | \mathbf{y})} \right\} \\ &= \min \left\{ 1, \frac{\pi(\mathbf{y} | \theta') \pi(\theta')}{\pi(\mathbf{y} | \theta_i) \pi(\theta_i)} \right\} \end{aligned}$$

is calculated, and a uniform random number,  $u$ , is generated on  $[0, 1]$ .

1. If  $u \leq \alpha(\theta_i, \theta')$ , we *accept* the proposal  $\theta'$  and set  $\theta' = \theta_{i+1}$ .
2. If  $u \geq \alpha(\theta_i, \theta')$ , we *reject* the proposal  $\theta'$  and set  $\theta_t = \theta_{i+1}$ .

The distribution of random draws  $\{\theta_i \mid i \in \{0, 1, \dots, N_s\}\}$  converges to our posterior distribution,  $\pi(\theta \mid \mathbf{y})$ , as  $N_s \rightarrow \infty$ . In practice, the number of iterations necessary for accurate inference depends on a number of factors, including the complexity of the problem, the number of parameters to be inferred, and the relationship between the posterior and proposal distributions. We outline our choice of  $N_s$  in Section S.3

## Metropolis-adjusted Langevin Algorithm (MALA)

Whilst the MH algorithm is relatively simple to understand and implement, it can fail to identify the posterior if it has a non-trivial, curved correlation structure<sup>[78]</sup>, or if it is multi-modal<sup>[79]</sup>. It can also become slow when dimensionality is high, i.e. when there are a large number of parameters to infer. In these cases the algorithm typically requires a very large number of samples, which is time consuming, especially if the likelihood calculation is slow. One way to address this is to use a sampling algorithm that uses the gradient of the posterior distribution, as well as its absolute values, to draw new samples. The gradient can help guide the search towards the modes of the posterior distribution, making for a more efficient algorithm which typically needs fewer samples. A number of different MCMC approaches utilise the gradient of the distribution, such as MALA, and the NO-U-Turn sampler<sup>[40]</sup>, which is an extension on the original Hamiltonian Monte Carlo (HMC)<sup>[42]</sup>.

We use MALA, since it is well-established that it has better convergence properties than the MH algorithm<sup>[80]</sup>. Our algorithm for MALA iterates over the same steps as the MH algorithm, with an adjusted expression for the proposed parameter combination. Where MH uses the proposal

$$\boldsymbol{\theta}' = \boldsymbol{\theta} + \sqrt{\epsilon}\Sigma^{1/2}\xi, \quad (18)$$

MALA instead uses

$$\boldsymbol{\theta}' = \boldsymbol{\theta} - (\epsilon/2)\Sigma U(\boldsymbol{\theta}) + \sqrt{\epsilon}\Sigma^{1/2}\xi, \quad (19)$$

where  $\xi \sim \phi(0, I_d)$ , with  $I_d$  denoting the  $d$ -dimensional identity matrix,  $d$  is the dimension of the posterior distribution, and  $U(\boldsymbol{\theta}) = -\nabla \log \pi(\mathbf{y} \mid \boldsymbol{\theta})$ .

### S.3 Implementation of adaptive sampling strategies

We seek to generate  $N_s$  independent samples that accurately characterise our posterior distribution, but samples are dependent on the starting point of the Markov chain. As increasingly many samples are generated, this dependence diminishes. The correlation between samples can be reduced if an appropriate covariance matrix is chosen for the proposal distribution. One suitable covariance

matrix is the covariance of the target posterior distribution, which may be estimated from samples of the MCMC itself. To do so, we *warm up* the Markov chains in two steps by drawing  $N_{w_1}$  samples and discarding the first  $N_{b_1}$  samples as *burn-in*. With the remaining samples we construct a proposal covariance matrix, and repeat the process with  $N_{w_2}$  samples and a burn-in of size  $N_{b_2}$ . The adaptive MCMC is then started using the covariance matrix estimated in this way as the proposal covariance matrix. We adaptively update our step size at iteration  $i$ ,  $\epsilon_i$ , using a modified version of Algorithm 4 from [Andrieu and Thoms \(2008\)](#).

At each iteration  $i$ , the step size is updated using

$$\begin{aligned}\gamma_1 &= \frac{1}{i^{c_1}}, \\ \gamma_2 &= c_0 \gamma_1, \\ \log(\epsilon_{i+1}^2) &= \log(\epsilon_i^2) + \gamma_2(\alpha_i - 0.574),\end{aligned}\tag{20}$$

where  $c_0 = 1$ ,  $c_1 = \log(10)/\log(N_s/5)$ , and  $\alpha_i$  is the current acceptance probability. We use 0.574 as the target acceptance rate for MALA, as shown above, and 0.234 for MH<sup>[81]</sup>.

In our experience, this approach results in far better performance than without warm up or adaptively updating the step size. In practice, we found that consistent posteriors are obtained by running 8 Markov chains in parallel, where each chain has  $N_s = 80,000$ ,  $N_{w_1} = 0.3 \times N_s$ ,  $N_{w_2} = 0.7 \times N_s$ , and  $N_{b_i} = 0.5 \times N_{w_i}$ ,  $i = 1, 2$ . Warm up samples from all eight chains are pooled to calculate the covariance matrix for the final run of MCMC. This approach to warm up is used in the same way when either sampler, MH or MALA, is chosen.

## S.4 Computing the gradient of the log-posterior

The Kalman filter has previously been used within gradient based sampling schemes<sup>[46]</sup>, which illustrated that it is possible to calculate the gradient with an iterative scheme similar to the scheme for the direct likelihood calculation. In the following, we show that these previous approaches can be extended to derive the gradient of the delay-mediated Kalman filter used here.

For MALA, we compute the derivative of the negative log-posterior  $U = -\log(\pi(\boldsymbol{\theta}|\mathbf{y}))$  with

respect to the parameters,  $\boldsymbol{\theta}$ ,

$$\begin{aligned}
 \frac{\partial U(\boldsymbol{\theta})}{\partial \boldsymbol{\theta}} &= \frac{\partial(-\log(\pi(\mathbf{y} | \boldsymbol{\theta})\pi(\boldsymbol{\theta})))}{\partial \boldsymbol{\theta}} \\
 &= \frac{\partial\left(-\log\left(\prod_{t \in \mathcal{T}} \phi(y_t; F\rho_t, FP_tF^T + \Sigma_\epsilon)\pi(\boldsymbol{\theta})\right)\right)}{\partial \boldsymbol{\theta}} \\
 &= -\frac{\partial}{\partial \boldsymbol{\theta}} \log\left(\prod_{t \in \mathcal{T}} \frac{\exp\left(-\frac{1}{2}(y_t - F\rho_t)^T(FP_tF^T + \Sigma_\epsilon)^{-1}(y_t - F\rho_t)\right)\pi(\boldsymbol{\theta})}{\sqrt{\det(2\pi(FP_tF^T + \Sigma_\epsilon))}}\right) \\
 &= \frac{\partial}{\partial \boldsymbol{\theta}} \left[ \sum_{t \in \mathcal{T}} \frac{1}{2} \log(\det(2\pi S_t(\boldsymbol{\theta}))) + \right. \\
 &\quad \left. \frac{1}{2} \sum_{t \in \mathcal{T}} (y_t - F\rho_t(\boldsymbol{\theta}))^T (S_t(\boldsymbol{\theta}))^{-1} (y_t - F\rho_t(\boldsymbol{\theta})) - \log(\pi(\boldsymbol{\theta})) \right],
 \end{aligned}$$

where  $S = FP_tF^T + \Sigma_\epsilon$  has been used in the last line, and the dependence of  $\rho$  and  $S$  on  $\boldsymbol{\theta}$  has been emphasized.  $\mathcal{T}$  denotes the set of time points for each observation,  $\{i \cdot l \mid i \in \{0, 1, \dots, n-1\}\}$ . For a single parameter this simplifies to

$$\begin{aligned}
 \frac{\partial U(\boldsymbol{\theta})}{\partial \theta_k} &= \frac{1}{2} \sum_{t \in \mathcal{T}} \left( \text{Tr} \left( S_t^{-1} \frac{\partial S_t}{\partial \theta_k} \right) \right) - \frac{1}{2} \sum_{t \in \mathcal{T}} \left( F \frac{\partial \rho_t}{\partial \theta_k} \right)^T S_t^{-1} (y_t - F\rho_t) \\
 &\quad - \frac{1}{2} \sum_{t \in \mathcal{T}} (y_t - F\rho_t)^T S_t^{-1} \frac{\partial S_t}{\partial \theta_k} S_t^{-1} (y_t - F\rho_t) \\
 &\quad - \frac{1}{2} \sum_{t \in \mathcal{T}} (y_t - F\rho_t)^T S_t^{-1} F \frac{\partial \rho_t}{\partial \theta_k} - \frac{\partial(\log(\pi(\boldsymbol{\theta})))}{\partial \theta_k}.
 \end{aligned} \tag{21}$$

This expression can be explicitly calculated if  $d\rho_t/d\theta_k$  and  $dP_t/d\theta_k$  are known at each observation time point  $t$ . These quantities are the predicted state space mean and variance in the prediction step of the Kalman filter. This implies that eq. (21) can be calculated if the prediction step is adjusted to predict the derivative of  $\rho$  and  $P$  in addition to their absolute values. To enable this adjustment of the prediction step, we derive differential equations for  $\frac{d}{dt}(d\rho_t/d\theta_k)$  and  $\frac{d}{dt}(dP_t/d\theta_k)$ :

$$\frac{d}{dt} \left( \frac{\partial \rho_t}{\partial \theta_k} \right) = \frac{\partial}{\partial \theta_k} \left( \frac{d\rho_t}{dt} \right)$$

$$\begin{aligned}
&= \frac{\partial}{\partial \theta_k} (g(\rho_t) + f(\rho_{t-\tau})) \\
&= \frac{\partial g(\rho_t)}{\partial \rho_t} \frac{\partial \rho_t}{\partial \theta_k} + \frac{\partial g(\rho_t)}{\partial \theta_k} + \frac{\partial f(\rho_{t-\tau})}{\partial \rho_{t-\tau}} \frac{\partial \rho_{t-\tau}}{\partial \theta_k} + \frac{\partial f(\rho_{t-\tau})}{\partial \theta_k} \\
&= J_g(\rho_t) \frac{\partial \rho_t}{\partial \theta_k} + \frac{\partial g(\rho_t)}{\partial \theta_k} + J_f(\rho_{t-\tau}) \frac{\partial \rho_{t-\tau}}{\partial \theta_k} + \frac{\partial f(\rho_{t-\tau})}{\partial \theta_k}, \tag{22}
\end{aligned}$$

and

$$\begin{aligned}
\frac{d}{dt} \left( \frac{\partial P_t}{\partial \theta_k} \right) &= \frac{\partial}{\partial \theta_k} \left( \frac{dP_t}{dt} \right) \\
&= \frac{\partial}{\partial \theta_k} \left( J_g(\rho_t) P_t + P_t^T J_g(\rho_t)^T \right. \\
&\quad \left. + J_f(\rho_{t-\tau}) P_{t-\tau,t} + P_{t,t-\tau} J_f(\rho_{t-\tau})^T \right. \\
&\quad \left. + l(\rho_t) + q(\rho_{t-\tau}) \right) \\
&= J_g(\rho_t) \frac{\partial P_t}{\partial \theta_k} + \frac{\partial P_t^T}{\partial \theta_k} J_g(\rho_t)^T + J_f(\rho_{t-\tau}) \frac{\partial P_{t-\tau,t}}{\partial \theta_k} + \frac{\partial P_{t,t-\tau}}{\partial \theta_k} J_f(\rho_{t-\tau})^T \\
&\quad + \left( \sum_{j=1}^2 \left( \frac{\partial J_g(\rho_{t_j})}{\partial \rho_{t_j}} \frac{\partial \rho_{t_j}}{\partial \theta_k} \right) + \frac{\partial J_g(\rho_t)}{\partial \theta_k} \right) P_t + P_t^T \left( \sum_{j=1}^2 \left( \frac{\partial J_g(\rho_{t_j})}{\partial \rho_{t_j}} \frac{\partial \rho_{t_j}}{\partial \theta_k} \right) + \frac{\partial J_g(\rho_t)}{\partial \theta_k} \right)^T \\
&\quad + \left( \sum_{j=1}^2 \left( \frac{\partial J_f(\rho_{t-\tau_j})}{\partial \rho_{t-\tau_j}} \frac{\partial \rho_{t-\tau_j}}{\partial \theta_k} \right) + \frac{\partial J_f(\rho_{t-\tau})}{\partial \theta_k} \right) P_{t-\tau,t} \\
&\quad + P_{t,t-\tau} \left( \sum_{j=1}^2 \left( \frac{\partial J_f(\rho_{t-\tau_j})}{\partial \rho_{t-\tau_j}} \frac{\partial \rho_{t-\tau_j}}{\partial \theta_k} \right) + \frac{\partial J_f(\rho_{t-\tau})}{\partial \theta_k} \right)^T \\
&\quad + \left( \sum_{j=1}^2 \left( \frac{\partial l(\rho_{t_j})}{\partial \rho_{t_j}} \frac{\partial \rho_{t_j}}{\partial \theta_k} \right) + \frac{\partial l(\rho_t)}{\partial \theta_k} \right) + \left( \sum_{j=1}^2 \left( \frac{\partial q(\rho_{t_j})}{\partial \rho_{t_j}} \frac{\partial \rho_{t_j}}{\partial \theta_k} \right) + \frac{\partial q(\rho_t)}{\partial \theta_k} \right) \tag{23}
\end{aligned}$$

where  $\rho_{t_j}$  means the  $j$ th element of  $\rho_t$ . Similarly,

$$\frac{d}{dt} \left( \frac{\partial P_{s,t}}{\partial \theta_k} \right) = \frac{\partial}{\partial \theta_k} \left( \frac{dP_{s,t}}{dt} \right)$$

$$\begin{aligned}
&= \frac{\partial}{\partial \theta_k} (P_{s,t} J_g^T(\rho_t) + P_{s,t-\tau} J_f^T(\rho_{t-\tau})) \\
&= \frac{\partial P_{s,t}}{\partial \theta_k} J_g^T(\rho_t) + \frac{\partial P_{s,t-\tau}}{\partial \theta_k} J_f^T(\rho_{t-\tau}) \\
&\quad + P_{s,t} \left( \sum_{j=1}^2 \left( \frac{\partial J_g(\rho_{t_j})}{\partial \rho_{t_j}} \frac{\partial \rho_{t_j}}{\partial \theta_k} \right) + \frac{\partial J_g(\rho_t)}{\partial \theta_k} \right)^T \\
&\quad + P_{s,t-\tau} \left( \sum_{j=1}^2 \left( \frac{\partial J_f(\rho_{t-\tau_j})}{\partial \rho_{t-\tau_j}} \frac{\partial \rho_{t-\tau_j}}{\partial \theta_k} \right) + \frac{\partial J_f(\rho_{t-\tau})}{\partial \theta_k} \right)^T. \tag{24}
\end{aligned}$$

Similar to the delay differential equations for the state space mean and variance, it is necessary to define values for non-positive times for the delay differential equations provided here before the first prediction step can be executed. To do so, we need to provide derivatives of the initialisation of the state space mean and variance provided in Section S.1. We calculate the derivatives of  $p^*$  and  $m^*$  with respect to each parameter,  $\theta_k$ , as follows:

$$\frac{\partial p^*}{\partial \theta_k} = \frac{-\frac{\partial}{\partial \theta_k} \left( \frac{\alpha_m \alpha_p}{\mu_m \mu_p} \right) f(p^*) - \left( \frac{\alpha_m \alpha_p}{\mu_m \mu_p} \right) \frac{\partial}{\partial \theta_k} (f(p^*))}{\left( \frac{\alpha_m \alpha_p}{\mu_m \mu_p} \right) \frac{\partial}{\partial p^*} f(p^*) - 1}, \tag{25}$$

$$\frac{\partial m^*}{\partial \theta_k} = \frac{\partial}{\partial \theta_k} \left( \frac{\mu_p}{\alpha_p} p^* \right). \tag{26}$$

## S.5 Update step derivatives

The delay differential equations given by eqs. (22) to (24) can be used to predict the derivatives of the state space mean and variance with respect to each model parameter, using  $d\rho_t^*/d\theta_k$  and  $dP_t^*/d\theta$  as initial (and past) conditions. We incorporate the integration of these ODEs into the prediction step of our Kalman filter. The derivatives of  $d\rho_t^*/d\theta_k$  and  $dP_t^*/d\theta$  at each observation can be calculated by extending the update step. Using eqs. (15) to (17), we have

$$\frac{\partial \rho_{t-\tau:t}^*}{\partial \theta_k} = \frac{\partial}{\partial \theta_k} (\rho_{t-\tau:t} + K_{t-\tau:t} (y_t - F \rho_t))$$

$$= \frac{\partial \rho_{t-\tau:t}}{\partial \theta_k} + \frac{\partial K_{t-\tau:t}}{\partial \theta_k} (y_t - F \rho_t) - K_{t-\tau:t} F \frac{\partial \rho_t}{\partial \theta_k}, \quad (27)$$

$$\begin{aligned} \frac{\partial P_{t-\tau:t}^*}{\partial \theta_k} &= \frac{\partial}{\partial \theta_k} (P_{t-\tau:t} - K_{t-\tau:t} S_t K_{t-\tau:t}^T) \\ &= \frac{\partial P_{t-\tau:t}}{\partial \theta_k} - \frac{\partial K_{t-\tau:t}}{\partial \theta_k} S_t K_{t-\tau:t}^T - K_{t-\tau:t} \frac{\partial S_t}{\partial \theta_k} K_{t-\tau:t}^T - K_{t-\tau:t} S_t \left( \frac{\partial K_{t-\tau:t}}{\partial \theta_k} \right)^T, \end{aligned} \quad (28)$$

$$\begin{aligned} \frac{\partial K_{t-\tau:t}}{\partial \theta_k} &= \frac{\partial}{\partial \theta_k} (P_{t-\tau:t,t} F^T S_t^{-1}) \\ &= \frac{\partial P_{t-\tau:t,t}}{\partial \theta_k} F^T S_t^{-1} - P_{t-\tau:t,t} F^T S_t^{-1} \frac{\partial S_t}{\partial \theta_k} S_t^{-1} \\ &= \frac{\partial P_{t-\tau:t,t}}{\partial \theta_k} F^T S_t^{-1} - P_{t-\tau:t,t} F^T S_t^{-1} F \frac{\partial P_{t-\tau:t}}{\partial \theta_k} F^T S_t^{-1}. \end{aligned} \quad (29)$$

Here,  $\frac{\partial \rho_{t-\tau:t}}{\partial \theta_k}$  and  $\frac{\partial P_{t-\tau:t}}{\partial \theta_k}$  are the derivatives for the state space mean and variance that have been predicted in the previous prediction step. Hence, we can evaluate eq. (21) for each of the parameters iteratively by evaluating eqs. (22) to (24), (27) and (28) at each update step, and integrating eqs. (10) to (12) within each prediction step of the Kalman filter.

## S.6 Choice of priors and reparameterisation of variables

Bayesian methods require the choice of prior parameter distributions. For the mRNA and protein degradation rates,  $\mu_m$  and  $\mu_p$ , we use fixed values throughout, which are based on previously identified experimental measurements<sup>[2]</sup>. This facilitates our analysis of experimental time course data from the same paper in Figure 4. For the transcription and translation rates,  $\alpha_m$  and  $\alpha_p$ , we use prior distributions that are log-uniform. For all other parameters, we choose uniform prior distributions. Our chosen parameter ranges are informed by existing literature values<sup>[2;8;19;22;82;83]</sup>, and summarised in Table S1.

The choice of log-uniform priors for the transcription and translation rates,  $\alpha_m$  and  $\alpha_p$ , is motivated by the fact that possible values for these parameters span multiple orders of magnitude, from 0.01 – 120/min and 0.01 – 40/min respectively. To enable sampling from these log-uniform

| Parameter                            | Range of Values                           |
|--------------------------------------|-------------------------------------------|
| Repression threshold, $P_0$          | 0 - 120,000 <sup>[22]</sup>               |
| Hill Coefficient, $h$                | 2 - 6 <sup>[8;22]</sup>                   |
| Protein degradation rate, $\mu_p$    | $\log(2)/(90 \text{ min})$ <sup>[2]</sup> |
| mRNA degradation rate, $\mu_m$       | $\log(2)/(30 \text{ min})$ <sup>[2]</sup> |
| Basal transcription rate, $\alpha_m$ | 0.01/min - 60/min <sup>[82;83]</sup>      |
| Translation rate, $\alpha_p$         | 1/min - 40/min <sup>[19]</sup>            |
| Transcriptional delay, $\tau$        | 5 min - 40 min <sup>[8;22]</sup>          |

Table S1: The values each of the parameters of the model can take, in relation to the HES5 system, informed by experimental work and biophysical limitations. These values define the prior distributions which we use in our parameter inference algorithms.

priors, we convert the parameters into logarithmic space using

$$\tilde{\theta} = \ln(\theta),$$

where  $\theta$  represents the parameter that is being transformed into logarithmic space, i.e.  $\alpha_m$  or  $\alpha_p$ .

Let  $P_1(\theta | \mathbf{y})$  and  $P_2(\tilde{\theta} | \mathbf{y})$  define the posterior distributions for the original and transformed parameter respectively. A transformation of variables changes the shape of the posterior distribution according to

$$P_2(\tilde{\theta} | \mathbf{y})d\tilde{\theta} = P_1(\theta | \mathbf{y})d\theta$$

which in turn gives

$$\begin{aligned} P_2(\tilde{\theta} | \mathbf{y}) &= \theta P_1(\theta | \mathbf{y}) \\ &= e^{\tilde{\theta}} P_1(e^{\tilde{\theta}} | \mathbf{y}), \end{aligned} \tag{30}$$

since  $\frac{d\tilde{\theta}}{d\theta} = \frac{1}{\theta}$ .

Using  $P_1(\theta | \mathbf{y}) = L(\mathbf{y} | \theta)\pi_1(\theta)$  and considering a prior that is uniform in logarithmic space, i.e.  $\pi_1(\theta) = C/\theta$  with an appropriately chosen constant  $C$ , eq. (30) leads to

$$\begin{aligned} \ln(P_2(\tilde{\theta} | \mathbf{y})) &= \tilde{\theta} + \ln(L(\mathbf{y} | e^{\tilde{\theta}})) + \ln\left(\frac{C}{\theta}\right) \\ &= \ln(L(\mathbf{y} | e^{\tilde{\theta}})) + \ln(C) \end{aligned}$$



$$= \ln(L(\mathbf{y} \mid \theta)) + \ln(C), \quad (31)$$

Lastly, taking the derivative gives

$$\frac{\partial}{\partial \tilde{\theta}} \ln(P_2(\tilde{\theta} \mid \mathbf{y})) = \theta \frac{\partial}{\partial \theta} \ln(L(\mathbf{y} \mid \theta)). \quad (32)$$

## S.7 MCMC success is qualified by multiple convergence diagnostics

When using MCMC samplers such as MH and MALA, it is necessary to check for convergence of the sampled distribution and to identify whether a sufficient number of samples has been generated. A combination of convergence diagnostics give confidence that the obtained samples are useful and represent the posterior accurately. Specifically, we use the split- $\hat{R}$  and effective sample size (ESS) methods<sup>[84;85]</sup>. We follow the guidance of Vehtari et. al.<sup>[85]</sup>, running multiple chains ( $m > 4$ ), and conclude convergence when split- $\hat{R} < 1.01$  and the total ESS is at least  $50 \times 2 \times m$ .

When testing our algorithm on *in silico* data, we choose the relative mean error and the coefficient of variation as test diagnostics. Specifically, for a given set of *in silico* data, let  $\mu_{\theta_i}$  define the true value of each parameter that generated the data set, and let  $\hat{\mu}_{\theta_i}, \hat{\sigma}_{\theta_i}$  define the posterior mean and variance, respectively, for each parameter. We measure the accuracy of inference by looking at both the coefficient of variation (CV) and the relative mean error (ME), summed across all parameters,  $\theta$ :

$$CV_{\theta} = \sum_{\theta_i} \frac{\hat{\sigma}_{\theta_i}}{\mu_{\theta_i}}, \quad (33)$$

$$ME_{\theta} = \sum_{\theta_i} \frac{|\mu_{\theta_i} - \hat{\mu}_{\theta_i}|}{\mu_{\theta_i}}. \quad (34)$$

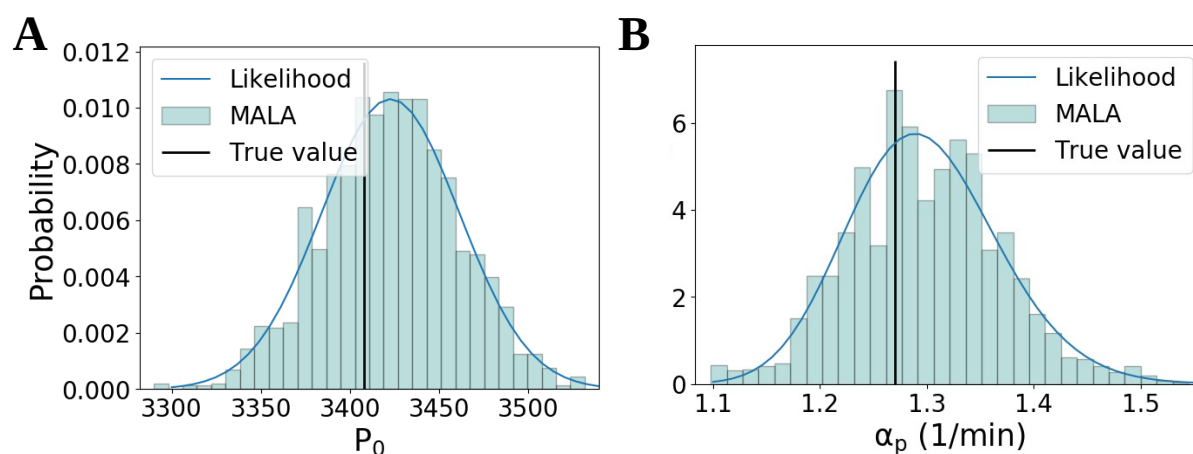

Figure S1: **Our algorithm accurately samples posterior distributions. A, B.** Posterior distributions for one-dimensional inference. For individual model parameters, posterior distributions were inferred while keeping all other parameters fixed, respectively. Shown above are the inferred marginal posteriors for the repression threshold (A) and translation rate (B) respectively as histograms, using MALA as the underlying sampling algorithm for 2500 samples. The blue lines are the analytical likelihood calculations. The sampled and analytical distributions coincide. Other parameters are shown in Figure 2.

| Parameter                                | True Value | $\mu$ (MALA) | $\mu$ (MH) | $\sigma$ (MALA) | $\sigma$ (MH) |
|------------------------------------------|------------|--------------|------------|-----------------|---------------|
| log Transcription rate, $\log(\alpha_m)$ | 2.764      | 2.784        | 2.782      | 0.054           | 0.052         |
| log Translation rate, $\log(\alpha_p)$   | 0.239      | 0.259        | 0.255      | 0.055           | 0.053         |
| Transcriptional delay, $\tau$            | 30.0       | 30.546       | 30.652     | 6.653           | 6.578         |

Table S2: The true values for the parameters which were used to generate the data in Figure 3A, alongside the means,  $\mu$ , and standard deviations,  $\sigma$  of the corresponding one-dimensional posterior distributions, from both the MALA and MH algorithms (Figure S2).

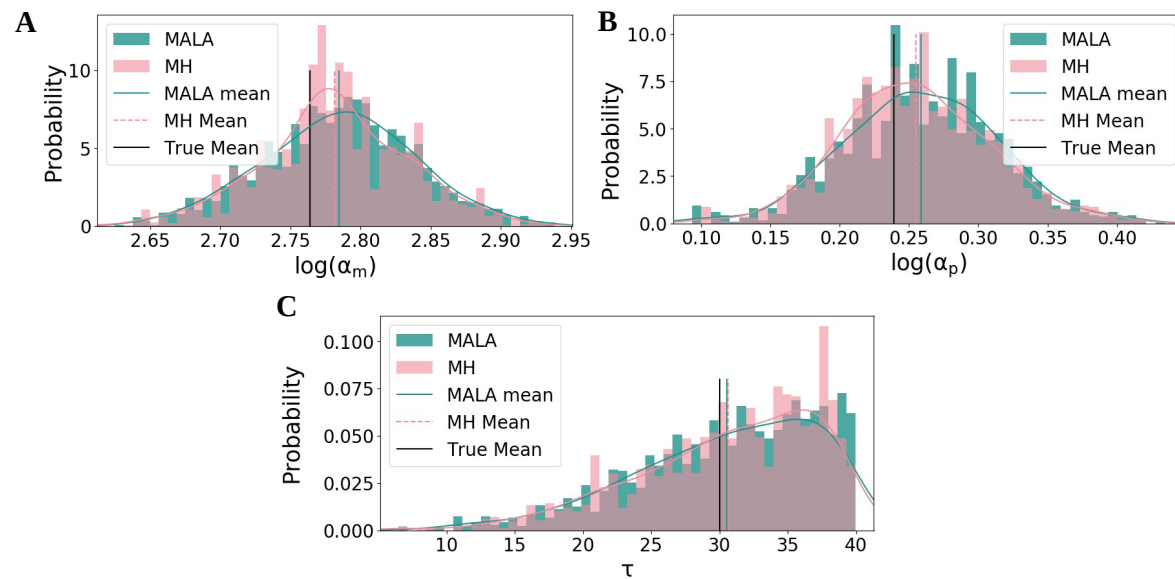

Figure S2: **Our algorithm accurately samples posterior distributions. A, B, C.** Histograms for both MALA and MH on the 1-dimensional problem for the transcription rate (A), translation rate (B) and transcriptional delay (C). Histograms and kernel density estimates are plotted, alongside the mean from each chain and the ground truth value. Other parameters are shown in Figure 2.

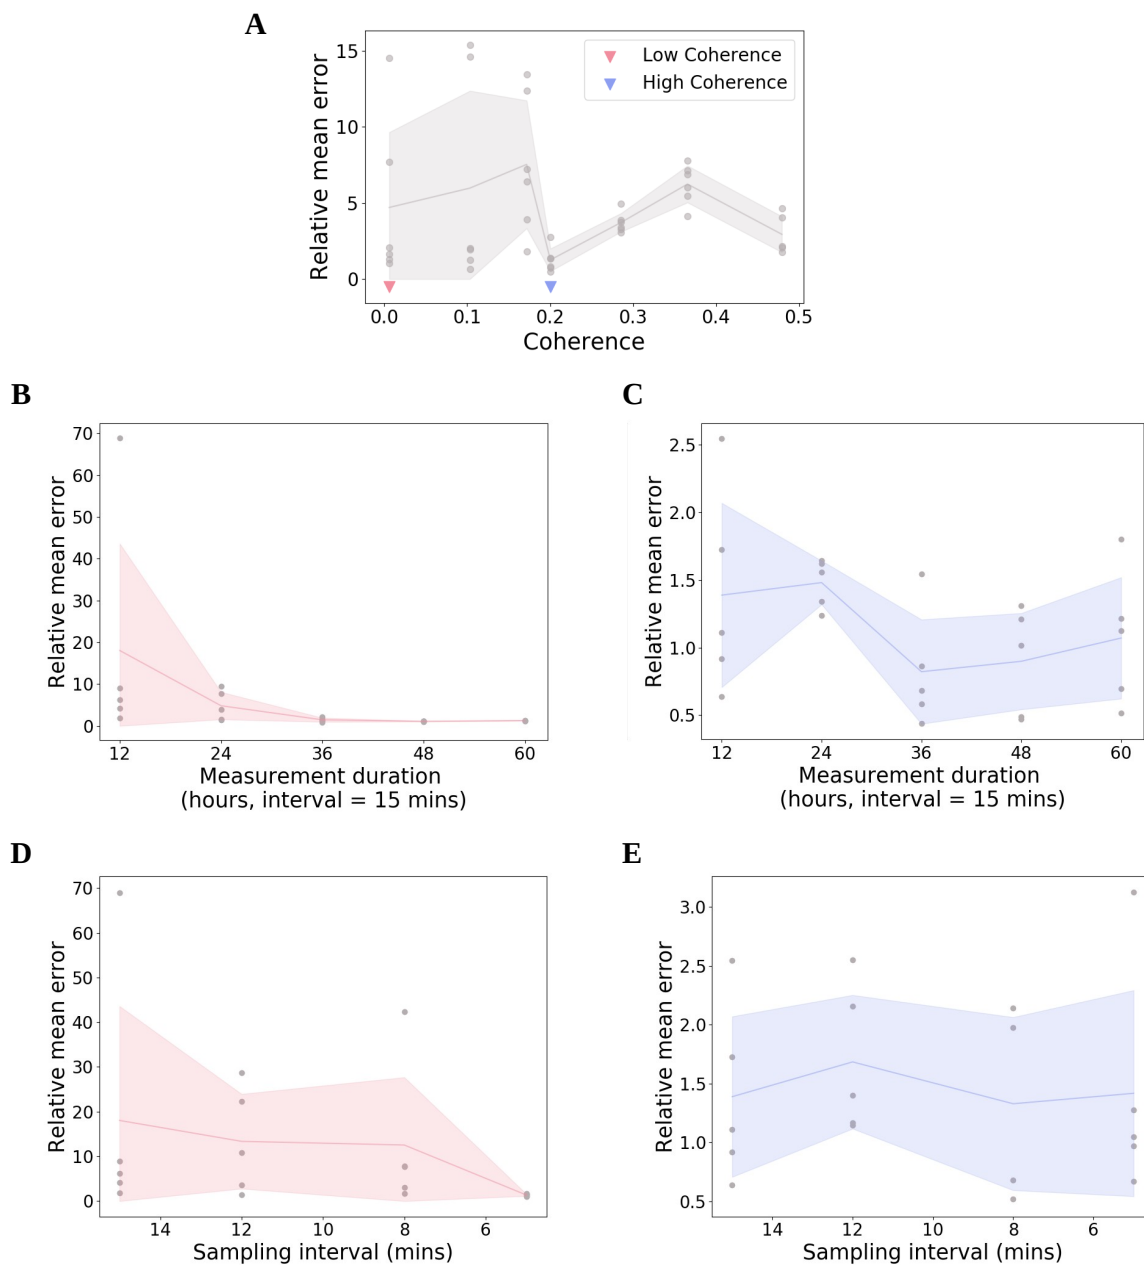

Figure S3: **Increasing the length of time course data improves inference more than increased sampling frequency.** **A.** Values of the  $ME_{\theta}$  (see eq. (34)) for data sets spanning multiple coherence values. The grey shaded region spans one standard deviation from the mean over all datasets for each value. The pink and purple triangles correspond to the low and high coherence data sets in Figure 5A. **B.**  $ME_{\theta}$  for low coherence data sets sampled with different lengths, from 12 hours to 60 hours. As length increases from 12 hours to 36 hours, both the mean and standard deviation decreases by an order of magnitude. **C.** Same as B with the high coherence data sets. Whilst the trend is the same, note the different y-axis range. **D.**  $ME_{\theta}$  for low coherence data sets sampled with different frequencies. As frequency increases from 15 minutes to 5 minutes, both the mean and standard deviation decreases by an order of magnitude. **E.** Same as D with the high coherence data sets. Again, note the y-axis range.
